# Supplementary material for: Shingles, Zostavax vaccination and risk of developing dementia: a nested case–control study—results from the UK Biobank cohort
Source: PubMed Central journal article supplement — BMJ Open. 2021 Oct 8;11(10):e045871. doi: 10.1136/bmjopen-2020-045871 (PMC8504358; doi:10.1136/bmjopen-2020-045871), 2021-10-08
Supplement: bmjopen-2020-045871.draft_revisions.pdf [file bmjopen-2020-045871.draft_revisions.pdf]

# BMJ Open

BMJ Open is committed to open peer review. As part of this commitment we make the peer review history of every article we publish publicly available.

When an article is published we post the peer reviewers' comments and the authors' responses online. We also post the versions of the paper that were used during peer review. These are the versions that the peer review comments apply to.

The versions of the paper that follow are the versions that were submitted during the peer review process. They are not the versions of record or the final published versions. They should not be cited or distributed as the published version of this manuscript.

BMJ Open is an open access journal and the full, final, typeset and author-corrected version of record of the manuscript is available on our site with no access controls, subscription charges or pay-per-view fees (<http://bmjopen.bmj.com>).

If you have any questions on BMJ Open's open peer review process please email [info.bmjopen@bmj.com](mailto:info.bmjopen@bmj.com)

# BMJ Open

## Shingles and risk of developing dementia: results from the UK Biobank cohort.

|                               |                                                                                                                                                                                                                                                                                                                                                                                                                                                                                                                                                                                                                           |
|-------------------------------|---------------------------------------------------------------------------------------------------------------------------------------------------------------------------------------------------------------------------------------------------------------------------------------------------------------------------------------------------------------------------------------------------------------------------------------------------------------------------------------------------------------------------------------------------------------------------------------------------------------------------|
| Journal:                      | <i>BMJ Open</i>                                                                                                                                                                                                                                                                                                                                                                                                                                                                                                                                                                                                           |
| Manuscript ID                 | bmjopen-2020-045871                                                                                                                                                                                                                                                                                                                                                                                                                                                                                                                                                                                                       |
| Article Type:                 | Original research                                                                                                                                                                                                                                                                                                                                                                                                                                                                                                                                                                                                         |
| Date Submitted by the Author: | 15-Oct-2020                                                                                                                                                                                                                                                                                                                                                                                                                                                                                                                                                                                                               |
| Complete List of Authors:     | Lophatananon, Artitaya ; UoM, Division of Population Health, Health Services Research and Primary Care<br>Mekli, Krisztina; UoM, Division of Population Health, Health Services Research and Primary Care<br>Cant, Rachel; The University of Manchester, Division of Pharmacy & Optometry<br>Burns, Alistair; UoM, School of Community Based Medicine<br>Dobson, Curtis; The University of Manchester, Division of Pharmacy & Optometry<br>Itzhaki, Ruth; University of Oxford, The Oxford Institute of Population Ageing<br>Muir, Kenneth; UoM, Division of Population Health, Health Services Research and Primary Care |
| Keywords:                     | Dementia < NEUROLOGY, EPIDEMIOLOGY, Public health < INFECTIOUS DISEASES                                                                                                                                                                                                                                                                                                                                                                                                                                                                                                                                                   |
|                               |                                                                                                                                                                                                                                                                                                                                                                                                                                                                                                                                                                                                                           |

SCHOLARONE™  
Manuscripts

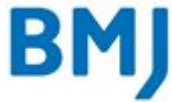

I, the Submitting Author has the right to grant and does grant on behalf of all authors of the Work (as defined in the below author licence), an exclusive licence and/or a non-exclusive licence for contributions from authors who are: i) UK Crown employees; ii) where BMJ has agreed a CC-BY licence shall apply, and/or iii) in accordance with the terms applicable for US Federal Government officers or employees acting as part of their official duties; on a worldwide, perpetual, irrevocable, royalty-free basis to BMJ Publishing Group Ltd ("BMJ") its licensees and where the relevant Journal is co-owned by BMJ to the co-owners of the Journal, to publish the Work in this journal and any other BMJ products and to exploit all rights, as set out in our [licence](#).

The Submitting Author accepts and understands that any supply made under these terms is made by BMJ to the Submitting Author unless you are acting as an employee on behalf of your employer or a postgraduate student of an affiliated institution which is paying any applicable article publishing charge ("APC") for Open Access articles. Where the Submitting Author wishes to make the Work available on an Open Access basis (and intends to pay the relevant APC), the terms of reuse of such Open Access shall be governed by a Creative Commons licence – details of these licences and which [Creative Commons](#) licence will apply to this Work are set out in our licence referred to above.

Other than as permitted in any relevant BMJ Author's Self Archiving Policies, I confirm this Work has not been accepted for publication elsewhere, is not being considered for publication elsewhere and does not duplicate material already published. I confirm all authors consent to publication of this Work and authorise the granting of this licence.

1  
2  
3 **Shingles and risk of developing dementia: results from the UK Biobank cohort.**  
4  
5

6 Artitaya Lophatananon (Ph.D.)<sup>1</sup>, Krisztina Mekli (Ph.D.)<sup>1</sup>, Rachel Cant (Ph.D.)<sup>2</sup>, Alistair Burns  
7 (CBE FRCP)<sup>3</sup> Curtis Dobson (Ph.D.)<sup>2,5</sup>, Ruth Itzhaki (Ph.D.)<sup>4,5</sup>, Kenneth R Muir (Ph.D.)<sup>1,5\*</sup>  
8  
9

10  
11  
12 <sup>1</sup> Division of Population Health, Health Services Research and Primary Care, School of Health  
13 Sciences, Faculty of Biology, Medicine and Health, The University of Manchester, Manchester,  
14 M13 9PT  
15

16  
17  
18 <sup>2</sup> Division of Pharmacy & Optometry, School of Health Sciences, Faculty of Biology, Medicine  
19 and Health, The University of Manchester, M13 9PT  
20  
21

22  
23  
24 <sup>3</sup> Division of Neuroscience & Experimental Psychology, School of Biological Sciences, Faculty  
25 of Biology, Medicine and Health, The University of Manchester, M13 9PT  
26  
27

28  
29 <sup>4</sup> The Oxford Institute of Population Ageing, University of Oxford, Oxford, OX2 6PR  
30  
31

32 <sup>5</sup> Joint senior author  
33  
34

35  
36 \*Corresponding author E-mail address: kenneth.muir@manchester.ac.uk  
37  
38  
39  
40  
41  
42  
43  
44  
45  
46  
47  
48  
49  
50  
51  
52  
53  
54  
55  
56  
57  
58  
59  
60

## Abstract

Objectives: To investigate association between shingles and dementia, and to examine how any association is affected by Zostavax vaccination.

Design: Nested case-control study.

Settings: Data were from the UKbiobank cohort study with a total of 502,650 participants (both males and females).

Participants: The analysis included 3,658 incident dementia cases and 497,992 controls.

Inclusion criteria for incident cases was dementia diagnosis 3 years or more after the first assessment date from all sources including ICD10, 9, self-reported and primary care linkage record. Subjects with no dementia code from all sources were coded as controls. Shingles and Zostavax vaccination were investigated for their association with dementia risk.

Results: Subjects with shingles diagnosed 3 years or more prior to dementia diagnosis were at 60% increased risk of developing dementia. In those subjects who had not had Zostavax vaccination, shingles increased the risk of dementia (OR 1.35 with 95%CI. 1.16 to 1.58) however a non-significant decrease in risk was found for subjects who had been vaccinated against VZV (OR 0.76 with 95% CI. 0.42 to 1.36).

Conclusion: A history of shingles was associated with an increased risk of dementia, indicating that VZV may play-a role in the development of dementia. In subjects who were eligible for the immunisation and vaccinated with Zostavax we saw no increased risk of developing dementia.

Word counts: 217

## Article summary

### Strengths and limitations of this study

1. This study used data available for the entire cohort of the UK Biobank and disease outcomes were ascertained through robust sources including the Hospital Episodes Statistics (HES) and through primary care data linkage.

1  
2  
3 2. Recent studies investigated the possible role of varicella zoster virus (VZV) – and dementia.  
4 We reported an association between shingles (the major disease in older people caused by VZV)  
5 and the risk of developing dementia in this UK cohort.  
6  
7

8  
9 3. As VZV is the only herpesvirus for which an effective vaccine (Zostavax) is approved, we  
10 have also been able, for the first time, to establish whether vaccination against a herpesvirus  
11 influences any association seen with dementia.  
12  
13

14  
15 4. This study inherits some weakness in that the UKBiobank study participants are not fully  
16 representative of the UK population, as suggested by low prevalence of dementia compared to  
17 the general population. Our findings however suggest the true effect of this particular virus on  
18 dementia may in fact be higher in the general population.  
19  
20

21  
22 5. We did not investigate other type of herpes viruses that may also play role in dementia  
23 aetiology.  
24  
25  
26  
27  
28  
29  
30  
31  
32  
33  
34  
35  
36  
37  
38  
39  
40  
41  
42  
43  
44  
45  
46  
47  
48  
49  
50  
51  
52  
53  
54  
55  
56  
57  
58  
59  
60

## Introduction

The number of people worldwide afflicted with Alzheimer's disease (AD) or dementia of other types is high – the AD number being estimated to be currently at least 30 million, and by 2150 predicted to exceed 152 million. The recent Lancet Commission on dementia has highlighted potentially reversible causes<sup>1</sup>. Despite many years of research into the role of beta amyloid, the main component of the characteristic plaques seen in AD brains, no significant advances confirming a role for beta amyloid in causing the disease, or in the treatment of AD have yet been made. One unrelated possibility gaining increasing attention is whether viruses may have a role in initiating or aiding the development of dementia. For example, we previously proposed that herpes simplex virus type 1 (HSV1) is present in latent form in the post mortem brains of elderly people, causing both direct viral damage and inflammation on reactivation, and that this damage accumulates over time, leading eventually to the development of AD<sup>2,3</sup>.

The possibility of involvement of other herpesviruses in the disease and in dementia has also been investigated, albeit to a very much lesser extent. Cytomegalovirus has been suggested to cause immune dysregulation, thereby leading to reactivation of latent HSV1<sup>4,5</sup>. The potential role of Varicella-zoster virus (VZV), another herpesvirus, in dementia has rarely been considered. However, it is very common, infecting most people in childhood with the primary infection resulting in chicken pox. The virus, remains latent in the body lifelong, in the case of VZV, it persists in the cranial nerves and dorsal root ganglia. Reactivation causes herpes zoster, known more commonly as shingles, which appears as a painful rash usually on one side of the torso.

The main risk factor for shingles, as with dementia, is increasing age. The reactivated virus can enter the brain, causing a productive infection, inflammation and cell death, as well as long-term effects in some cases such as cognitive decline. An early investigation of brain from AD patients and age-matched controls was unable to detect VZV DNA in brain of either group<sup>3</sup>, but this result has not since been confirmed or disproved by PCR searches of greater sensitivity. However, even if VZV is not present in brain, this does not preclude its having a role in AD, as VZV reactivation in the periphery can have an effect on the central nervous system (CNS).

1  
2  
3 In a study aiming to investigate any links between shingles and three amyloid-associated  
4 diseases of aging including AD, Bubak et al (2020)<sup>6</sup> found that herpes zoster plasma has  
5 significantly higher levels of beta amyloid and amylin than have controls, and that addition of  
6 exogenous beta amyloid or amylin causes increases amyloid aggregation. The authors concluded  
7 that shingles might accelerate progression of these diseases via aggregation of beta amyloid.  
8  
9

10  
11  
12  
13 In this study, we investigated whether there was an association between shingles and risk of  
14 developing dementia in the UK Biobank cohort. Zostavax vaccination, which is used to prevent  
15 shingles (zoster) and zoster-related post-herpetic neuralgia, has been offered routinely by the  
16 NHS from 2013 for people aged 70-80. The uptake was initially 61.8% although it has declined  
17 more recently (42.8% in 2016/17)<sup>7</sup>. VZV is the only herpesvirus for which an effective vaccine  
18 is currently approved, and so for the first time the possible impact on dementia risk of  
19 vaccination against a herpesvirus was investigated also.  
20  
21  
22  
23  
24  
25  
26

## 27 **Methodology**

### 28 **Study design**

29 A nested case-control study.  
30  
31  
32  
33

### 34 **Cohort description**

35 The UK Biobank (UKB) is a national cohort with 502,650 participants (both males and females)  
36 aged between 39 to 71 years. Participants were recruited in 2006-2010, aged 40-69 years at the  
37 time and continue to be longitudinally followed to capture subsequent health events. More details  
38 can be found at <http://www.ukbiobank.ac.uk/>. Participants consented to the UK Biobank for their  
39 data and /or samples to be used for health-related research purposes. Ethics approved for UK  
40 Biobank was obtained from the North West- Haydock research ethics committee (REC  
41 reference: 16/NW/0274). All findings were deposited within the UKBiobank website as a way of  
42 dissemination to all participants and other researchers.  
43  
44  
45  
46  
47  
48  
49  
50

### 51 **Dementia case identification**

#### 52 **ICD 10 and 9**

53 The ICD 10 and 9 codes for dementia were obtained from the publication by Wilkinson et al<sup>8</sup>.  
54  
55  
56  
57  
58  
59  
60



1  
2  
3 The ICD 10 has 212 data fields (follow-up data) and the ICD 9 has 46 data fields (follow-up  
4 data). Our analysis used data available up to 31<sup>st</sup> January 2020. Information on the date when the  
5 codes were recorded was available for each follow-up. For subjects with any of the dementia  
6 codes appearing more than once, the earliest diagnosis date was used.  
7  
8  
9

### 10 11 12 **Primary Care record linkage**

13 Data from Primary Care linkage was available in 45% of the UK Biobank participants at the time  
14 of this analysis. There are two versions of medical Read codes available in the UKB: version 2  
15 (v2) and version 3 (ctV3 or v3). Both versions provide a standard vocabulary for clinicians to  
16 record patient findings and procedures, in health and social care IT systems across primary and  
17 secondary care within the National Health Service (NHS) in the UK.  
18  
19  
20  
21  
22  
23

24 First, we applied the dementia medical Read code version 2 listed in the article by Wilkinson<sup>8</sup>.  
25 We further mapped read code version 2 with version 3 using the mapping file. This mapping file  
26 was provided by the UKB. The mapping file allows the specific code to be mapped across  
27 different platforms. We then generated Structured Query Language (SQL) to extract data from  
28 the UKB portal. The date on when dementia was recorded was also extracted. This enabled us to  
29 define if the case was an incident or prevalent case. For individuals where dementia codes  
30 appeared more than once, the record with the earliest date was kept (first time of diagnosis).  
31  
32  
33  
34  
35  
36  
37

38 All dementia cases across all data sources were then further classified into one of the following:  
39 incident or prevalent cases and controls.  
40  
41  
42

### 43 **Criteria for case and control identification**

44 For incident cases, subjects had to fulfil both of the following criteria 1) dementia diagnosis  
45 occurred 3 years or more after the first assessment date and 2) subjects with a dementia code  
46 from any sources. For controls, subjects with no dementia code from all sources were coded as  
47 controls.  
48  
49  
50  
51  
52

### 53 **Shingles identification**

54 We used three sources to derive shingles variable including ICD10, 9 and Primary Care record  
55  
56  
57  
58  
59  
60

1  
2  
3 linkage. We used the same approach to identify shingles cases and further applied a 3-year  
4 window prior to age at dementia diagnosis for cases and age at last follow up for controls. In  
5 subjects who had shingles diagnosis more than once, the first diagnosis was used. Shingles  
6 variable was coded as binary (yes/no).  
7  
8  
9

### 10 11 12 **Zostavax vaccination**

13 We investigated also the association of shingles and dementia in sub-cohort of subjects who were  
14 eligible for Zostavax vaccination (vaccine used to prevent shingles and zoster-related post-  
15 herpetic neuralgia). Data were extracted from the Primary Care linkage record only. The code  
16 provided by the UKB was used to identify Zostavax vaccination including date of event.  
17 Zostavax vaccine was available within the NHS from 2013 onwards for people age 70 and over.  
18 We therefore computed the age of subjects in 2013 and included only those with age 70+ in this  
19 sub-analysis. Zostavax vaccination variable was coded as binary (yes/no). Of those who were  
20 vaccinated, 13.6% had had shingles before vaccination.  
21  
22  
23  
24  
25  
26  
27  
28

### 29 **Patient and Public Involvement**

30 There is no patient and public involvement in this study as we analysed dataset obtained from the  
31 UKbiobank.  
32  
33  
34  
35

### 36 **Statistical analysis**

37 Logistic regression analysis was performed using Stata version 15.0<sup>9</sup>. Odds ratios (ORs) and  
38 95% confidence intervals (CIs) were estimated. A significant odds ratio is considered when 95%  
39 CI does not include 1. For shingles and Zostavax vaccination variable, “no” category was used as  
40 reference category. We tested if age (at diagnosis for cases and until last follow up in 2017 for  
41 controls) and gender were a confounding factor for shingles and a dementia outcome. Each  
42 potential confounder was tested and had to satisfy two criteria if they were to be defined as a  
43 confounder.  
44  
45  
46  
47  
48  
49  
50

51 Criterion 1: among the unexposed (subjects with no shingles code), there should be an  
52 association between the confounder and the dementia outcome.  
53  
54  
55  
56  
57  
58  
59

Criterion 2: the potential confounder must be associated with the main exposure (shingles), but not as a result of the exposure. To achieve this, we tested the association between the confounder and shingles in the control population.

Our analysis suggested that only age is a confounding factor. We therefore fitted the model adjusted for age.

## Results

There were 3,658 incident cases and 497,992 controls, with dementia cases on average being older than controls (see Table 1). The Student t-test suggested this difference was significant ( $P$ -value  $< 0.05$ ). The number of female participants was slightly higher than males (54.41% female and 45.59% male - see Table 2). There were however more males than females in the incident group. The total number of participants who had shingles was 35,781 (or 7.14%) (Table 3). There were almost 12% of dementia cases with shingles as compared to 7% of controls. Results from Chi-square test suggested a significant difference in distribution of shingles between dementia cases and controls ( $P$ -value  $< 0.05$ ).

**Table 1 Summary statistics showing age of control and incident (dementia) cases**

| Group                   | N      | Mean  | SD   | Min   | Max   |
|-------------------------|--------|-------|------|-------|-------|
| Incident dementia cases | 3658   | 69.55 | 6.24 | 44.00 | 79.00 |
| Controls (No dementia)  | 497992 | 65.40 | 8.11 | 46.00 | 83.00 |

*Student-t test p-value 0.0000*

**Table 2 Distribution of gender in the control and incident (dementia) groups**

| Sex    | Incident dementia Cases (%) | Controls (No dementia) (%) | Total          |
|--------|-----------------------------|----------------------------|----------------|
| Female | 1778 (48.61)                | 271164 (54.45)             | 272942 (54.41) |
| Male   | 1880 (51.39)                | 226828 (45.55)             | 228708 (45.59) |
| Total  | 3658 (100)                  | 497992 (100)               | 501650 (100)   |

**Table 3 Distribution of shingles for the case control and incident (dementia) case groups.**

| Shingles | Incident dementia cases (%) | Controls (No dementia) (%) | Total (%)      |
|----------|-----------------------------|----------------------------|----------------|
| No       | 3217 (88.21)                | 462460 (92.90)             | 465677 (92.86) |
| Yes      | 430 (11.79)                 | 35351 (7.10)               | 35781 (7.14)   |
| Total    | 3647 (100)                  | 497811 (100)               | 501458 (100)   |

*Pearson chi-square = 120.1433 P-value  $< 0.05$*

After adjusting for age, subjects with shingles diagnosed 3 years or more prior to dementia diagnosis were at 60% increased risk of developing dementia (95% C.I 1.45 to 1.78) (Table 4).

**Table 4 Estimated risk of dementia with or without > 3 year prior shingles diagnosis.**

| Shingles | Odds ratio <sup>#</sup> | St.Err. | P-value | [95% Confident Interval] |       |
|----------|-------------------------|---------|---------|--------------------------|-------|
| No       | 1.000                   |         |         |                          |       |
| Yes      | 1.607                   | 0.083   | <0.001  | 1.452                    | 1.779 |

<sup>#</sup> adjusted for age

To examine the effect of Zostavax vaccination on dementia, first, we included any subjects who reported had had shingles before and after Zostavax vaccine (Table 5a). Results show that in subjects who had had dementia. An inverse association suggesting decreased risk was observed for subjects who had been vaccinated (OR 0.761 with 95%CI.C 0.424 to 1.364); however, this did not reach statistical significance.

As it appears that there is a higher incidence of shingles in the group that have vaccination, we removed from our calculations those subjects who had had shingles *before* they were vaccinated (13.6%). This then demonstrated that vaccination against shingles decreased, as expected, the subsequent incidence of shingles (1.33%). Importantly, there is no dementia case in shingles group who had Zostavax vaccine (Table 5b).

**Table 5a Estimated risk of dementia with or without > 3 year prior shingles diagnosis, in subjects with and without vaccination.**

| Zostavax vaccination | Shingles | Dementia                   |                             |              | Odds ratio | 95% Confident Interval |       |
|----------------------|----------|----------------------------|-----------------------------|--------------|------------|------------------------|-------|
|                      |          | Controls (No dementia) (%) | Incident dementia cases (%) | Total (%)    |            |                        |       |
| Yes                  | No       | 4969 (84.75)               | 95 (87.96)                  | 5064 (84.81) | 1.000      |                        |       |
|                      | Yes      | 894 (15.25)                | 13 (12.04)                  | 907 (15.19)  | 0.761      | 0.424                  | 1.364 |
|                      | Total    | 5863 (100)                 | 108 (100)                   | 5971 (100)   |            |                        |       |
| No                   | No       | 78258 (92.10)              | 1589 (89.57)                | 79847(92.04) | 1.000      |                        |       |
|                      | Yes      | 6717 (7.90)                | 185 (10.43)                 | 6902 (7.96)  | 1.356      | 1.163                  | 1.583 |
|                      | Total    | 84975 (100)                | 1774 (100)                  | 86749 (100)  |            |                        |       |

**Table 5b distribution of shingles and dementia in subjects who had shingles after Zostavax vaccine**

| Shingles | Dementia                      |                                |              |
|----------|-------------------------------|--------------------------------|--------------|
|          | Controls<br>(No dementia) (%) | Incident dementia<br>cases (%) | Total (%)    |
| No       | 4969 (98.65)                  | 95 (100.00)                    | 5064 (98.67) |
| Yes      | 68 (1.35)                     | 0 (0.00)                       | 68 (1.33)    |
| Total    | 5037 (100.00)                 | 95 (100.00)                    | 5132 (100)   |

## Discussion

In this study, we found a significant difference in distribution of shingles between dementia incident cases and controls in a cohort with large sample sizes. Our main finding is that shingles increases the risk of incident case dementia. A possible explanation is that VZV is a direct cause of dementia or that shingles causes inflammation in the periphery that leads to brain inflammation and possible reactivation of HSV1 and/or that VZV, like CMV, causes immune dysregulation as suggested for the role of CMV in AD, by Stowe et al. (2012)<sup>4</sup> and Westman et al. (2014)<sup>5</sup>.

In our analysis, we opted to restrict the date of shingles diagnosis to those who were diagnosed 3 years prior to dementia diagnosis, to minimise possible detection bias from too short an exposure time prior to study outcome. Similarly, for dementia incident cases, we used a diagnosis date of 3 years after their first attendance date. This was done to minimise likelihood of including prevalent cases of dementia. This approach has been used previously for dementia outcomes in the UKB dataset<sup>10</sup>.

In the United Kingdom (UK) the incidence of HZ increases from 7.1 per 1000 person-years among 60–64 year olds to 12.2 per 1000 among individuals aged  $\geq 85$ <sup>11</sup>. The lifetime risk of HZ is around 10–30%<sup>12</sup>. Although rare, it is possible to have shingles more than once. In our study, overall shingles incidence rate was 8.01 per 1000 person-years. We further examined incidence in the sub-cohort aged 60–64, and found that shingles incidence rate was 7.56 per 1000 person-years, which is close to the reported national figure.

People with a weakened immune system are at higher risk of shingles. Neurological sequelae in shingles sufferers range from mild to severe in immunocompetent patients to extremely severe

1  
2  
3 and even fatal, in immunocompromised people. Several studies have evaluated changes in  
4 cognition after the very rare disease herpes zoster encephalitis (HZE), and/or other  
5 neuropsychiatric sequelae<sup>13-15</sup>. Antiviral treatment with acyclovir or valacyclovir was used in  
6 every study apart from that of Appelbaum et al.<sup>13</sup>, who used "no specific therapy". The results  
7 were variable, Wetzel et al. (2002)<sup>15</sup> detecting no change (apart from possible impairment of  
8 "visuo-constructive abilities"), whereas the others found appreciable deterioration; however, all  
9 these studies used only very small numbers of patients, of variable ages, and variable periods of  
10 assessment after the acute disease. More recently, Grahn et al (2013)<sup>16</sup> investigated 14 patients,  
11 age range 19 to 83, three years after the acute disease, and found that the patients showed signs  
12 of long-term cognitive impairment in the domains of speed and attention, memory and learning  
13 and executive function; also, a greater proportion of VZV patients was classified with mild  
14 cognitive impairment (MCI), compared with 28 controls, matched for age and gender.

15  
16  
17  
18  
19  
20  
21  
22  
23  
24 Two recent population epidemiological studies in Taiwan on VZV and dementia/AD implicated  
25 VZV in the disease<sup>17 18</sup>. Investigations were made using the Taiwan National Health Insurance  
26 Research Database, which operated from 1995 and to which 99.9% of the population subscribed  
27 (by 2014). The first study<sup>17</sup> investigated 846 patients with herpes zoster ophthalmicus (HZO),  
28 mean age 61.6 years, and 2538 age-matched comparison patients. The patients were identified by  
29 first-time principal diagnosis in clinics or in hospitals, and the comparison patients were selected  
30 by matching them with a given HZO patient in their usage of medical services in the same index  
31 year. The incidences rates of senile dementia were investigated within the 5-year period after  
32 their index dates. The covariate-adjusted HR of dementia was found to be 2.97 (95% CI, 1.90-  
33 4.67), revealing that the risk of developing dementia was high in HZO patients (no details of any  
34 antiviral treatment were provided).

35  
36  
37  
38  
39  
40  
41  
42  
43  
44 In the second study<sup>18</sup>, Chen et al compared almost 40,000 patients diagnosed with herpes zoster  
45 with the same number of controls, aged 50-90 years in the period 1997-2013, the mean follow-up  
46 period being 6 years. The definition of herpes zoster was based on at least one inpatient and/or  
47 outpatient diagnosis. The incidence of senile dementia was found to be slightly higher than that  
48 of controls (HR 1.11, 95% CI: 1.04-1.17). However, comparing VZV patients treated with  
49 antivirals with untreated patients, the risk of SD was greatly diminished (adjusted relative risk,  
50  
51  
52  
53  
54  
55  
56  
57  
58  
59  
60

1  
2  
3 0.55, 95% CI 0.34-0.65). Thus, in contrast to the HZO result, the increased risk of SD was low in  
4 HZ patients, yet antiviral treatment was highly protective.  
5  
6

7 Direct comparisons cannot be made between our results and those of Chen et al because all the  
8 patients in the UK shingles group would almost certainly have been treated with antivirals,  
9 whereas only about 5% of the Taiwanese shingles patients were treated thus. Chen et al. were  
10 therefore able to compare not only risk of dementia for shingles patients - mostly untreated - with  
11 matched controls, but also risk for antiviral-treated shingles patients compared with untreated  
12 shingles patients. Surprisingly though, in our study the risk of dementia for shingles patients is  
13 higher rather than lower than in the Taiwan study. Whether this results from differences in  
14 ethnicity is unknown. A further possible explanation is that the difference relates to adjustment  
15 for additional variables in in the Chen analyses.  
16  
17  
18  
19  
20  
21  
22

23 We also sought to look at the possible modifying effects of vaccination with Zostavax. In our  
24 study the non-vaccinated subjects, subjects were at 35% increased risk, with this reaching  
25 statistical significance (P value<0.0001). Subjects who had been vaccinated showed the inverse  
26 effect, with a decreased dementia risk of around 24%, although this did not reach statistical  
27 significance Table 5a. What is perhaps unsurprising, in view of the severity of shingles'  
28 symptoms, is that in our cohort, a high proportion of people who had had shingles then decided  
29 to be vaccinated. Thus in Table 5b, we have removed the data on this group when calculating the  
30 effect of vaccination against shingles on incidence of dementia, and when calculating the effect  
31 of vaccination on shingles incidence, as obviously, the subjects had not been vaccinated *before*  
32 they had shingles.  
33  
34  
35  
36  
37  
38  
39  
40

41 Our findings thus show that people at older age who have not had Zostavax vaccination are at  
42 increased risk of dementia, and indicate that this vaccination may protect against subsequent  
43 dementia.  
44  
45  
46

47 The protective effect of vaccination against shingles on subsequent incidence of dementia is  
48 presumably attributable to the reduced likelihood of the subjects suffering from shingles, and  
49 could be explained by a decreased occurrence of reactivation of HSV1 in brain, caused by  
50 indirect or possibly direct action of VZV. We suggested this explanation in a previous  
51 comment<sup>19</sup> on the observed protective effect against AD of vaccines against diphtheria, tetanus,  
52 poliomyelitis and influenza <sup>20</sup>. In fact, a further example has been noted very recently, namely,  
53  
54  
55  
56  
57  
58  
59  
60

1  
2  
3 vaccination against BCG, which showed that neuropsychiatric symptoms can occur even if a  
4 putative pathogen is not present in brain<sup>21 22</sup>.

5  
6  
7 Our study has inherent strengths and weaknesses. The UKB is a national cohort of half a million  
8 people with an average follow up of almost 12 years (up until 2020). Disease outcome was  
9 ascertained by robust sources including the Hospital Episodes Statistics (HES) and through  
10 primary care data linkage. Although the primary care data linkage covered 45% of participants at  
11 the time of data analysis, this source of data has the benefit of capturing mild symptom shingles  
12 cases. Most people suffering from shingles seeks medical advice/treatment first from their GP  
13 prior to referral to hospital for further treatments, particularly with some severe cases, hence  
14 these data have enabled us to capture shingles cases in the community. We were able to  
15 demonstrate also the effect of shingles immunisation on shingles and dementia risk. The  
16 weaknesses include the fact that the UKB entire cohort consists of only 1.12% of all dementia  
17 cases with age of 65 and over, which is far less than the national figure prevalence of dementia -  
18 7.1% for the total age-standardised 65+ population (based on 2013 data)<sup>23</sup>. The diagnoses are  
19 also based on records rather than direct patient contact (although the validity seems satisfactory).  
20

21  
22  
23 It is to be noted that the UKB participants are in general healthier, less obese and smoke less than  
24 people in the general population. It was also reported that UKB participants suffered less heart  
25 and kidney disease and cancer as compared to the national figures<sup>24</sup>. This has led to a non-  
26 representative of the sampling population, a so-called a “healthy volunteer” selection bias. The  
27 fact that we have seen the dementia risk increase with shingles within this healthy cohort  
28 suggests that the effect of shingles on the general public might well be higher.  
29

30  
31  
32 We did not take any anti-herpetic treatments into account which could potentially have an effect  
33 on dementia risk if shingles occurred long before dementia diagnosis. Also, we did not include  
34 other types of herpesvirus in our analysis.  
35  
36

### 37 38 39 40 41 42 43 44 45 46 47 **Conclusion**

48  
49 Our study suggests a potential role of VZV in dementia, particularly in subjects who have not  
50 been vaccinated for VZV. Further studies should further investigate the role of Zostavax  
51 vaccination in reducing this excess risk of dementia and examine the possible causal pathway  
52 between HZ and dementia.  
53  
54  
55  
56  
57  
58  
59  
60



## **Acknowledgment**

We would like to thank all the UKB participants and staffs for making this study possible (Application number 5864).

## **Funding**

We would like to thank the Advantage Foundation for funding this work. KM and AL are also funded by the Alan Turing Institute under the EPSRC grant EP/N510129/1.

## **Role of sponsor**

Sponsor has no role in study design, data acquisition or involve in any process of data analysis.

## **License**

The Corresponding Author has the right to grant on behalf of all authors and does grant on behalf of all authors, an exclusive licence (or non exclusive for government employ-ees) on a worldwide basis to the BMJ Publishing Group Ltd (“BMJ”), and its Licencees to permit this article (if accepted) to be published in The BMJ’s editions and any other BMJ products and to exploit all subsidiary rights, as set out in our licence.”

## **Conflict of Interest**

There is no competing of interest.

## **Author contributions**

RI, CD and KM were involved in study conception, idea and design. KM, AL, AB and KM were involved in data acquisition and data quality check. AL carried out data analysis. AL, KM, RC, RI, CD carried out result interpretation. All authors involved in drafting and approved the final version of the manuscript. KM is the study guarantor.

## **Data Availability**

Upon publishing this article, we have fulfilled our proposed work agreement with the UK Biobank and have returned our data that we used for these analyses to the UKBiobank as part of the agreement. However, the data from the UK Biobank ([www.ukbiobank.ac.uk](http://www.ukbiobank.ac.uk)) are third party and their legal agreement means that we do not have permission to share the data. The UK

1  
2  
3 Biobank data used in this study can however be accessed by applying through the UK Biobank  
4 Access Management System ([www.ukbiobank.ac.uk/register-apply](http://www.ukbiobank.ac.uk/register-apply)).  
5  
6  
7  
8  
9  
10  
11  
12  
13  
14  
15  
16  
17  
18  
19  
20  
21  
22  
23  
24  
25  
26  
27  
28  
29  
30  
31  
32  
33  
34  
35  
36  
37  
38  
39  
40  
41  
42  
43  
44  
45  
46  
47  
48  
49  
50  
51  
52  
53  
54  
55  
56  
57  
58  
59  
60

## References

1. Livingston G, Huntley J, Sommerlad A, et al. Dementia prevention, intervention, and care: 2020 report of the Lancet Commission. *Lancet (London, England)* 2020 doi: 10.1016/s0140-6736(20)30367-6 [published Online First: 2020/08/03]
2. Jamieson GA, Maitland NJ, Wilcock GK, et al. Latent herpes simplex virus type 1 in normal and Alzheimer's disease brains. *Journal of medical virology* 1991;33(4):224-7. [published Online First: 1991/04/01]
3. Itzhaki RF, Lin WR, Shang D, et al. Herpes simplex virus type 1 in brain and risk of Alzheimer's disease. *Lancet (London, England)* 1997;349(9047):241-4. doi: 10.1016/s0140-6736(96)10149-5 [published Online First: 1997/01/25]
4. Stowe RP, Peek MK, Cutchin MP, et al. Reactivation of herpes simplex virus type 1 is associated with cytomegalovirus and age. *Journal of medical virology* 2012;84(11):1797-802. doi: 10.1002/jmv.23397 [published Online First: 2012/09/22]
5. Westman G, Berglund D, Widén J, et al. Increased inflammatory response in cytomegalovirus seropositive patients with Alzheimer's disease. *PloS one* 2014;9(5):e96779. doi: 10.1371/journal.pone.0096779 [published Online First: 2014/05/09]
6. Bubak AN, Beseler C, Como CN, et al. Acute zoster plasma contains elevated amyloid, correlating with A $\beta$ 42 and amylin levels, and is amyloidogenic. *Journal of neurovirology* 2020 doi: 10.1007/s13365-020-00830-7 [published Online First: 2020/05/10]
7. Dowden A. Is the UK shingles vaccination programme fit for the future? *Prescriber* 2018;29(7):23-26. doi: 10.1002/psb.1688
8. Wilkinson T, Schnier C, Bush K, et al. Identifying dementia outcomes in UK Biobank: a validation study of primary care, hospital admissions and mortality data. *Eur J Epidemiol* 2019;34(6):557-65. doi: 10.1007/s10654-019-00499-1 [published Online First: 2019/02/27]
9. StataCorp. Stata Statistical Software: Release 15. *College Station, TX: StataCorp LLC* 2017
10. Calvin CM, Wilkinson T, Starr JM, et al. Predicting incident dementia 3-8 years after brief cognitive tests in the UK Biobank prospective study of 500,000 people. *Alzheimer's & Dementia* 2019;15(12):1546-57. doi: <https://doi.org/10.1016/j.jalz.2019.07.014>
11. Curran D, Hunjan M, El Ghachi A, et al. Herpes zoster related healthcare burden and costs in immunocompromised (IC) and IC-free populations in England: an observational retrospective database analysis. *BMJ Open* 2019;9(8):e023502. doi: 10.1136/bmjopen-2018-023502
12. Thomas SL, Hall AJ. What does epidemiology tell us about risk factors for herpes zoster? *The Lancet Infectious diseases* 2004;4(1):26-33. doi: 10.1016/s1473-3099(03)00857-0 [published Online First: 2004/01/15]

- 1  
2  
3 13. Appelbaum E, Kreps SI, Sunshine A. Herpes zoster encephalitis. *The American journal of*  
4 *medicine* 1962;32:25-31. doi: 10.1016/0002-9343(62)90179-1 [published Online First:  
5 1962/01/01]  
6
- 7  
8 14. Hokkanen L, Launes J, Poutiainen E, et al. Subcortical type cognitive impairment in herpes  
9 zoster encephalitis. *Journal of neurology* 1997;244(4):239-45. doi:  
10 10.1007/s004150050078 [published Online First: 1997/04/01]  
11
- 12 15. Wetzel K, Asholt I, Herrmann E, et al. Good cognitive outcome of patients with herpes  
13 zoster encephalitis: a follow-up study. *Journal of neurology* 2002;249(11):1612-4. doi:  
14 10.1007/s00415-002-0874-2 [published Online First: 2003/01/21]  
15
- 16 16. Grahn BH, Bauer B, Silver T. Diagnostic ophthalmology. *The Canadian veterinary journal*  
17 *= La revue veterinaire canadienne* 2013;54(1):86-7. [published Online First: 2013/07/03]  
18
- 19 17. Tsai MC, Cheng WL, Sheu JJ, et al. Increased risk of dementia following herpes zoster  
20 ophthalmicus. *PloS one* 2017;12(11):e0188490. doi: 10.1371/journal.pone.0188490  
21 [published Online First: 2017/11/23]  
22  
23
- 24 18. Chen VC, Wu SI, Huang KY, et al. Herpes Zoster and Dementia: A Nationwide Population-  
25 Based Cohort Study. *The Journal of clinical psychiatry* 2018;79(1) doi:  
26 10.4088/JCP.16m11312 [published Online First: 2017/12/16]  
27  
28
- 29 19. Itzhaki RF, Dobson CB. Alzheimer's disease and herpes. *CMAJ : Canadian Medical*  
30 *Association journal = journal de l'Association medicale canadienne* 2002;167(1):13.  
31 [published Online First: 2002/07/26]  
32
- 33 20. Verreault R, Laurin D, Lindsay J, et al. Past exposure to vaccines and subsequent risk of  
34 Alzheimer's disease. *CMAJ : Canadian Medical Association journal = journal de*  
35 *l'Association medicale canadienne* 2001;165(11):1495-8. [published Online First:  
36 2002/01/05]  
37  
38
- 39 21. Helms J, Kremer S, Merdji H, et al. Neurologic Features in Severe SARS-CoV-2 Infection.  
40 *The New England journal of medicine* 2020;382(23):2268-70. doi:  
41 10.1056/NEJMc2008597 [published Online First: 2020/04/16]  
42
- 43 22. McManus RM, Heneka MT. Role of neuroinflammation in neurodegeneration: new insights.  
44 *Alzheimer's research & therapy* 2017;9(1):14. doi: 10.1186/s13195-017-0241-2  
45 [published Online First: 2017/03/06]  
46
- 47 23. Prince M, Knapp M, Guerchet M, et al. Dementia UK: Update Second Edition report ed,  
48 2014.  
49  
50
- 51 24. Fry A, Littlejohns TJ, Sudlow C, et al. Comparison of Sociodemographic and Health-Related  
52 Characteristics of UK Biobank Participants With Those of the General Population.  
53 *American Journal of Epidemiology* 2017;186(9):1026-34. doi: 10.1093/aje/kwx246  
54  
55  
56  
57  
58

STROBE Statement—checklist of items that should be included in reports of observational studies

|                           | Item No. | Recommendation                                                                                      | Page No. | Relevant text from manuscript                                                                                                                                                                                                                                                                                                                                                                                                                                                                                                                                  |
|---------------------------|----------|-----------------------------------------------------------------------------------------------------|----------|----------------------------------------------------------------------------------------------------------------------------------------------------------------------------------------------------------------------------------------------------------------------------------------------------------------------------------------------------------------------------------------------------------------------------------------------------------------------------------------------------------------------------------------------------------------|
| <b>Title and abstract</b> | 1        | (a) Indicate the study’s design with a commonly used term in the title or the abstract              | 2        | This study used a nested case-control study design.                                                                                                                                                                                                                                                                                                                                                                                                                                                                                                            |
|                           |          | (b) Provide in the abstract an informative and balanced summary of what was done and what was found | 2        | What was done: Shingles exposure and Zostavax vaccination were investigated with dementia risk.<br>What was found: Subjects with shingles diagnosed 3 years or more prior to dementia diagnosis were at 60% increased risk of developing dementia. For subjects who had not had Zostavax vaccination, shingles increased the risk of dementia (OR 1.356 with 95%CI.C 1.163 to 1.583). A decreased risk was found for subjects who had been vaccinated against VZV (OR 0.761 with 95%CI.C 0.424 to 1.364), but it did not quite reach statistical significance. |
| <b>Introduction</b>       |          |                                                                                                     |          |                                                                                                                                                                                                                                                                                                                                                                                                                                                                                                                                                                |
| Background/rationale      | 2        | Explain the scientific background and rationale for the investigation being reported                | 3-4      |                                                                                                                                                                                                                                                                                                                                                                                                                                                                                                                                                                |
| Objectives                | 3        | State specific objectives, including any prespecified hypotheses                                    | 4        | In this study, we investigated whether there was an association between shingles                                                                                                                                                                                                                                                                                                                                                                                                                                                                               |

For peer review only

| Item No.       | Recommendation                                                                                                                                                                                                                                                                                                                                                                                                                                                           | Page No. | Relevant text from manuscript                                                                                                                                                                                                                                                    |
|----------------|--------------------------------------------------------------------------------------------------------------------------------------------------------------------------------------------------------------------------------------------------------------------------------------------------------------------------------------------------------------------------------------------------------------------------------------------------------------------------|----------|----------------------------------------------------------------------------------------------------------------------------------------------------------------------------------------------------------------------------------------------------------------------------------|
|                |                                                                                                                                                                                                                                                                                                                                                                                                                                                                          |          | and risk of developing dementia in the UK Biobank cohort. VZV is the only herpesvirus for which an effective vaccine is currently approved, and so for the first time the possible impact on dementia risk of vaccination against a herpesvirus was investigated also.           |
| <b>Methods</b> |                                                                                                                                                                                                                                                                                                                                                                                                                                                                          |          |                                                                                                                                                                                                                                                                                  |
| Study design   | 4 Present key elements of study design early in the paper                                                                                                                                                                                                                                                                                                                                                                                                                | 4        | A nested case-control study.                                                                                                                                                                                                                                                     |
| Setting        | 5 Describe the setting, locations, and relevant dates, including periods of recruitment, exposure, follow-up, and data collection                                                                                                                                                                                                                                                                                                                                        | 4        | The UK Biobank (UKB) is a national cohort with 502,650 participants (both males and females) aged between 39 to 71 years. Participants were recruited in 2006-2010, aged 40-69 years at the time and continue to be longitudinally followed to capture subsequent health events. |
| Participants   | 6 (a) <i>Cohort study</i> —Give the eligibility criteria, and the sources and methods of selection of participants. Describe methods of follow-up<br><i>Case-control study</i> —Give the eligibility criteria, and the sources and methods of case ascertainment and control selection. Give the rationale for the choice of cases and controls<br><i>Cross-sectional study</i> —Give the eligibility criteria, and the sources and methods of selection of participants | 5        | Criteria for case and control identification<br>For incident cases, subjects had to fulfil both of the following criteria 1) dementia diagnosis occurred 3 years or more after the first assessment date and 2) subjects with a dementia code                                    |

| Item No.  | Recommendation                                                                                                                                                                                                         | Page No. | Relevant text from manuscript                                                                                                                                                                                                                                                                                                                                                                                                                                                                                                                                                                                                          |
|-----------|------------------------------------------------------------------------------------------------------------------------------------------------------------------------------------------------------------------------|----------|----------------------------------------------------------------------------------------------------------------------------------------------------------------------------------------------------------------------------------------------------------------------------------------------------------------------------------------------------------------------------------------------------------------------------------------------------------------------------------------------------------------------------------------------------------------------------------------------------------------------------------------|
|           |                                                                                                                                                                                                                        |          | from any sources. For controls, subjects with no dementia code from all sources were coded as controls.                                                                                                                                                                                                                                                                                                                                                                                                                                                                                                                                |
|           | <i>(b) Cohort study</i> —For matched studies, give matching criteria and number of exposed and unexposed<br><i>Case-control study</i> —For matched studies, give matching criteria and the number of controls per case | N/A      |                                                                                                                                                                                                                                                                                                                                                                                                                                                                                                                                                                                                                                        |
| Variables | 7 Clearly define all outcomes, exposures, predictors, potential confounders, and effect modifiers. Give diagnostic criteria, if applicable                                                                             | 5-6      | <p>Outcome: All dementia cases across all data sources were then further classified into one of the following: incident or prevalent cases and controls.</p> <p>Exposures: Shingles identification</p> <p>We used the same approach to identify shingles cases and further applied a 3-year window prior to age at dementia diagnosis for cases and age at last follow up for controls.</p> <p>Zostavax vaccination</p> <p>We investigated also the association of shingles and dementia in sub-cohort of subjects who were eligible for Zostavax vaccination- Zostavax vaccine was available within the NHS from 2013 onwards for</p> |

|                              | Item No. | Recommendation                                                                                                                                                                       | Page No. | Relevant text from manuscript                                                                                                                                                                                                                                                                                      |
|------------------------------|----------|--------------------------------------------------------------------------------------------------------------------------------------------------------------------------------------|----------|--------------------------------------------------------------------------------------------------------------------------------------------------------------------------------------------------------------------------------------------------------------------------------------------------------------------|
|                              |          |                                                                                                                                                                                      |          | <p>people age 70 and over. We therefore computed the age of subjects in 2013 and included only those with age 70+ in this sub-analysis.</p> <p>Confounders: Our analysis suggested that only age is a confounding factor. We therefore fitted the model adjusted for age.</p>                                      |
| Data sources/<br>measurement | 8*       | For each variable of interest, give sources of data and details of methods of assessment (measurement). Describe comparability of assessment methods if there is more than one group |          | <p>Shingles: We used three sources to derive shingles variable including ICD10, 9 and Primary Care record linkage.</p> <p>Zostavax vaccination: Data were extracted from the Primary Care linkage record only. The code provided by the UKB was used to identify Zostavax vaccination including date of event.</p> |
| Bias                         | 9        | Describe any efforts to address potential sources of bias                                                                                                                            | 6        | We tested if age (at diagnosis for cases and until last follow up in 2017 for controls) and gender were a confounding factor for shingles and a dementia outcome. Each potential confounder was tested and had to satisfy two criteria if they                                                                     |



1  
2  
3  
4  
5  
6  
7  
8  
9  
10  
11  
12  
13  
14  
15  
16  
17  
18  
19  
20  
21  
22  
23  
24  
25  
26  
27  
28  
29  
30  
31  
32  
33  
34  
35  
36  
37  
38  
39  
40  
41  
42  
43  
44  
45  
46

For peer review only

| Item No.   | Recommendation                               | Page No. | Relevant text from manuscript                                                                                                                                                                                                                                                                                                                                                                                                                                                                                                                                                                                                                                                                                                                                                                                           |
|------------|----------------------------------------------|----------|-------------------------------------------------------------------------------------------------------------------------------------------------------------------------------------------------------------------------------------------------------------------------------------------------------------------------------------------------------------------------------------------------------------------------------------------------------------------------------------------------------------------------------------------------------------------------------------------------------------------------------------------------------------------------------------------------------------------------------------------------------------------------------------------------------------------------|
| Study size | 10 Explain how the study size was arrived at | 6        | <p>were to be defined as a confounder.</p> <p>Criterion 1: among the unexposed (subjects with no shingles code), there should be an association between the confounder and the dementia outcome.</p> <p>Criterion 2: the potential confounder must be associated with the main exposure (shingles), but not as a result of the exposure. To achieve this, we tested the association between the confounder and shingles in the control population.</p> <p>Criteria for case and control identification</p> <p>For incident cases, subjects had to fulfil both of the following criteria 1) dementia diagnosis occurred 3 years or more after the first assessment date and 2) subjects with a dementia code from any sources. For controls, subjects with no dementia code from all sources were coded as controls.</p> |

Continued on next page

|    |              |    |                                                                                                |   |                                        |
|----|--------------|----|------------------------------------------------------------------------------------------------|---|----------------------------------------|
| 1  |              |    |                                                                                                |   |                                        |
| 2  | Quantitative | 11 | Explain how quantitative variables were handled in the analyses. If applicable, describe which | 6 | Shingles variable was coded as         |
| 3  | variables    |    | groupings were chosen and why                                                                  |   | binary (yes/no).                       |
| 4  |              |    |                                                                                                |   | Zostavax vaccination variable was      |
| 5  |              |    |                                                                                                |   | coded as binary (yes/no).              |
| 6  |              |    |                                                                                                |   | For shingles and Zostavax              |
| 7  |              |    |                                                                                                |   | vaccination variable, “no” category    |
| 8  |              |    |                                                                                                |   | was used as reference category.        |
| 9  |              |    |                                                                                                |   |                                        |
| 10 |              |    |                                                                                                |   |                                        |
| 11 | Statistical  | 12 | (a) Describe all statistical methods, including those used to control for confounding          | 6 | Logistic regression analysis was       |
| 12 | methods      |    |                                                                                                |   | performed using Stata version 15.0     |
| 13 |              |    |                                                                                                |   | 9. Odds ratios (ORs) and 95%           |
| 14 |              |    |                                                                                                |   | confidence intervals (CIs) were        |
| 15 |              |    |                                                                                                |   | estimated. A significant odds ratio    |
| 16 |              |    |                                                                                                |   | is considered when 95% CI does         |
| 17 |              |    |                                                                                                |   | not include 1. For shingles and        |
| 18 |              |    |                                                                                                |   | Zostavax vaccination variable, “no”    |
| 19 |              |    |                                                                                                |   | category was used as reference         |
| 20 |              |    |                                                                                                |   | category. We tested if age (at         |
| 21 |              |    |                                                                                                |   | diagnosis for cases and until last     |
| 22 |              |    |                                                                                                |   | follow up in 2017 for controls) and    |
| 23 |              |    |                                                                                                |   | gender were a confounding factor       |
| 24 |              |    |                                                                                                |   | for shingles and a dementia            |
| 25 |              |    |                                                                                                |   | outcome. Each potential confounder     |
| 26 |              |    |                                                                                                |   | was tested and had to satisfy two      |
| 27 |              |    |                                                                                                |   | criteria if they were to be defined as |
| 28 |              |    |                                                                                                |   | a confounder.                          |
| 29 |              |    |                                                                                                |   |                                        |
| 30 |              |    |                                                                                                |   |                                        |
| 31 |              |    |                                                                                                |   |                                        |
| 32 |              |    |                                                                                                |   |                                        |
| 33 |              |    | (b) Describe any methods used to examine subgroups and interactions                            | 6 | Zostavax vaccine was available         |
| 34 |              |    |                                                                                                |   | within the NHS from 2013 onwards       |
| 35 |              |    |                                                                                                |   | for people age 70 and over. We         |
| 36 |              |    |                                                                                                |   | therefore computed the age of          |
| 37 |              |    |                                                                                                |   | subjects in 2013 and included only     |
| 38 |              |    |                                                                                                |   | those with age 70+ in this sub-        |
| 39 |              |    |                                                                                                |   | analysis.                              |
| 40 |              |    |                                                                                                |   |                                        |
| 41 |              |    |                                                                                                |   |                                        |
| 42 |              |    |                                                                                                |   |                                        |

|                  |     |                                                                                                                                                                                                   |     |                                                                                                                                                                                                                          |
|------------------|-----|---------------------------------------------------------------------------------------------------------------------------------------------------------------------------------------------------|-----|--------------------------------------------------------------------------------------------------------------------------------------------------------------------------------------------------------------------------|
|                  |     | (c) Explain how missing data were addressed                                                                                                                                                       |     |                                                                                                                                                                                                                          |
|                  |     | (d) <i>Cohort study</i> —If applicable, explain how loss to follow-up was addressed                                                                                                               | N/A |                                                                                                                                                                                                                          |
|                  |     | <i>Case-control study</i> —If applicable, explain how matching of cases and controls was addressed                                                                                                |     |                                                                                                                                                                                                                          |
|                  |     | <i>Cross-sectional study</i> —If applicable, describe analytical methods taking account of sampling strategy                                                                                      |     |                                                                                                                                                                                                                          |
|                  |     | (e) Describe any sensitivity analyses                                                                                                                                                             | N/A |                                                                                                                                                                                                                          |
| <b>Results</b>   |     |                                                                                                                                                                                                   |     |                                                                                                                                                                                                                          |
| Participants     | 13* | (a) Report numbers of individuals at each stage of study—eg numbers potentially eligible, examined for eligibility, confirmed eligible, included in the study, completing follow-up, and analysed | 6   | There were 3,658 incident cases and 497,992 controls, with dementia cases.                                                                                                                                               |
|                  |     | (b) Give reasons for non-participation at each stage                                                                                                                                              | N/A |                                                                                                                                                                                                                          |
|                  |     | (c) Consider use of a flow diagram                                                                                                                                                                | N/A |                                                                                                                                                                                                                          |
| Descriptive data | 14* | (a) Give characteristics of study participants (eg demographic, clinical, social) and information on exposures and potential confounders                                                          | 7   | The number of female participants was slightly higher than males (54.41% female and 45.59% male - see Table 2). There were however more males than females in the incident group.                                        |
|                  |     | (b) Indicate number of participants with missing data for each variable of interest                                                                                                               | N/A |                                                                                                                                                                                                                          |
|                  |     | (c) <i>Cohort study</i> —Summarise follow-up time (eg, average and total amount)                                                                                                                  |     |                                                                                                                                                                                                                          |
| Outcome data     | 15* | <i>Cohort study</i> —Report numbers of outcome events or summary measures over time                                                                                                               |     |                                                                                                                                                                                                                          |
|                  |     | <i>Case-control study</i> —Report numbers in each exposure category, or summary measures of exposure                                                                                              | 7-8 | The total number of participants who had shingles was 35781 (or 7.14%) (Table 3). There were almost 12% of dementia cases with shingles as compared to 7% of controls.<br>Table 5 report number of Zostavax vaccination. |
|                  |     | <i>Cross-sectional study</i> —Report numbers of outcome events or summary measures                                                                                                                |     |                                                                                                                                                                                                                          |

|    |              |    |                                                                                                           |     |
|----|--------------|----|-----------------------------------------------------------------------------------------------------------|-----|
| 1  |              |    |                                                                                                           |     |
| 2  | Main results | 16 | (a) Give unadjusted estimates and, if applicable, confounder-adjusted estimates and their precision       | 7   |
| 3  |              |    | (eg, 95% confidence interval). Make clear which confounders were adjusted for and why they were           |     |
| 4  |              |    | included                                                                                                  |     |
| 5  |              |    |                                                                                                           |     |
| 6  |              |    |                                                                                                           |     |
| 7  |              |    |                                                                                                           |     |
| 8  |              |    |                                                                                                           |     |
| 9  |              |    |                                                                                                           |     |
| 10 |              |    |                                                                                                           |     |
| 11 |              |    | (b) Report category boundaries when continuous variables were categorized                                 | N/A |
| 12 |              |    | (c) If relevant, consider translating estimates of relative risk into absolute risk for a meaningful time | N/A |
| 13 |              |    | period                                                                                                    |     |
| 14 |              |    |                                                                                                           |     |

Continued on next page

|    |                   |    |                                                                                                                                                            |     |
|----|-------------------|----|------------------------------------------------------------------------------------------------------------------------------------------------------------|-----|
| 1  |                   |    |                                                                                                                                                            |     |
| 2  | Other analyses    | 17 | Report other analyses done—eg analyses of subgroups and interactions, and sensitivity analyses                                                             | 7-8 |
| 3  |                   |    |                                                                                                                                                            |     |
| 4  |                   |    |                                                                                                                                                            |     |
| 5  |                   |    |                                                                                                                                                            |     |
| 6  |                   |    |                                                                                                                                                            |     |
| 7  |                   |    |                                                                                                                                                            |     |
| 8  |                   |    |                                                                                                                                                            |     |
| 9  |                   |    |                                                                                                                                                            |     |
| 10 |                   |    |                                                                                                                                                            |     |
| 11 |                   |    |                                                                                                                                                            |     |
| 12 |                   |    |                                                                                                                                                            |     |
| 13 |                   |    |                                                                                                                                                            |     |
| 14 |                   |    |                                                                                                                                                            |     |
| 15 | <b>Discussion</b> |    |                                                                                                                                                            |     |
| 16 | Key results       | 18 | Summarise key results with reference to study objectives                                                                                                   | 8   |
| 17 |                   |    |                                                                                                                                                            |     |
| 18 |                   |    |                                                                                                                                                            |     |
| 19 |                   |    |                                                                                                                                                            |     |
| 20 |                   |    |                                                                                                                                                            |     |
| 21 |                   |    |                                                                                                                                                            |     |
| 22 |                   |    |                                                                                                                                                            |     |
| 23 |                   |    |                                                                                                                                                            | 10  |
| 24 |                   |    |                                                                                                                                                            |     |
| 25 |                   |    |                                                                                                                                                            |     |
| 26 | Limitations       | 19 | Discuss limitations of the study, taking into account sources of potential bias or imprecision. Discuss both direction and magnitude of any potential bias | 11  |
| 27 |                   |    |                                                                                                                                                            |     |
| 28 |                   |    |                                                                                                                                                            |     |
| 29 |                   |    |                                                                                                                                                            |     |
| 30 |                   |    |                                                                                                                                                            |     |
| 31 |                   |    |                                                                                                                                                            |     |
| 32 |                   |    |                                                                                                                                                            |     |
| 33 |                   |    |                                                                                                                                                            |     |
| 34 |                   |    |                                                                                                                                                            |     |
| 35 |                   |    |                                                                                                                                                            |     |
| 36 |                   |    |                                                                                                                                                            |     |
| 37 |                   |    |                                                                                                                                                            |     |
| 38 |                   |    |                                                                                                                                                            |     |
| 39 |                   |    |                                                                                                                                                            |     |
| 40 |                   |    |                                                                                                                                                            |     |
| 41 |                   |    |                                                                                                                                                            |     |
| 42 |                   |    |                                                                                                                                                            |     |
| 43 |                   |    |                                                                                                                                                            |     |
| 44 |                   |    |                                                                                                                                                            |     |
| 45 |                   |    |                                                                                                                                                            |     |
| 46 |                   |    |                                                                                                                                                            |     |

For peer review only

1  
2  
3  
4  
5  
6  
7  
8  
9  
10  
11  
12  
13  
14  
15  
16  
17  
18  
19  
20  
21  
22  
23  
24  
25  
26  
27  
28  
29  
30  
31  
32  
33  
34  
35  
36  
37  
38  
39  
40  
41  
42  
43  
44  
45  
46

analysis, this source of data has the benefit of capturing mild symptom shingles cases. Most people suffering from shingles seeks medical advice/treatment first from their GP prior to referral to hospital for further treatments, particularly with some severe cases, hence these data have enabled us to capture shingles cases in the community. We were able to demonstrate also the effect of shingles immunisation on shingles and dementia risk. The weaknesses include the fact that the UKB entire cohort consists of only 1.12% of all dementia cases with age of 65 and over, which is far less than the national figure prevalence of dementia - 7.1% for the total age-standardised 65+ population (based on 2013 data)<sup>23</sup>. The diagnoses are also based on records rather than direct patient contact (although the validity seems satisfactory). It is to be noted that the UKB participants are in general healthier, less obese and smoke less than people in the general population. It was also reported that UKB participants suffered less heart and kidney disease and cancer as compared to the national figures<sup>24</sup>.

1  
2  
3  
4  
5  
6  
7  
8  
9  
10  
11  
12  
13  
14  
15  
16  
17  
18  
19  
20  
21  
22  
23  
24  
25  
26  
27  
28  
29  
30  
31  
32  
33  
34  
35  
36  
37  
38  
39  
40  
41  
42  
43  
44  
45  
46

For peer review only

This has led to a non-representative of the sampling population, a so-called a “healthy volunteer” selection bias. The fact that we have seen the dementia risk increase with shingles within this healthy cohort suggests that the effect of shingles on the general public might well be higher.

|                  |    |                                                                                                                                                                            |       |                                                                                                                                                                                                                                                                                                                                                                                                                                                                                                                                                                                                                                                        |
|------------------|----|----------------------------------------------------------------------------------------------------------------------------------------------------------------------------|-------|--------------------------------------------------------------------------------------------------------------------------------------------------------------------------------------------------------------------------------------------------------------------------------------------------------------------------------------------------------------------------------------------------------------------------------------------------------------------------------------------------------------------------------------------------------------------------------------------------------------------------------------------------------|
| Interpretation   | 20 | Give a cautious overall interpretation of results considering objectives, limitations, multiplicity of analyses, results from similar studies, and other relevant evidence | 11-12 | It is to be noted that the UKB participants are in general healthier, less obese and smoke less than people in the general population. It was also reported that UKB participants suffered less heart and kidney disease and cancer as compared to the national figures <sup>24</sup> . This has led to a non-representative of the sampling population, a so-called a “healthy volunteer” selection bias. We did not take any anti-herpetic treatments into account which could potentially have an effect on dementia risk if shingles occurred long before dementia diagnosis. Also, we did not include other types of herpesvirus in our analysis. |
| Generalisability | 21 | Discuss the generalisability (external validity) of the study results                                                                                                      | 11    | The fact that we have seen the dementia risk increase with shingles within this healthy cohort suggests                                                                                                                                                                                                                                                                                                                                                                                                                                                                                                                                                |

that the effect of shingles on the general public might well be higher.

---

### Other information

|         |    |                                                                                                                                                               |    |                                                                                                                                                                                                                              |
|---------|----|---------------------------------------------------------------------------------------------------------------------------------------------------------------|----|------------------------------------------------------------------------------------------------------------------------------------------------------------------------------------------------------------------------------|
| Funding | 22 | Give the source of funding and the role of the funders for the present study and, if applicable, for the original study on which the present article is based | 12 | <p>Funding</p> <p>We would like to thank the Advantage Foundation for funding this work.</p> <p>Role of sponsor</p> <p>Sponsor has no role in study design, data acquisition or involve in any process of data analysis.</p> |
|---------|----|---------------------------------------------------------------------------------------------------------------------------------------------------------------|----|------------------------------------------------------------------------------------------------------------------------------------------------------------------------------------------------------------------------------|

\*Give information separately for cases and controls in case-control studies and, if applicable, for exposed and unexposed groups in cohort and cross-sectional studies.

**Note:** An Explanation and Elaboration article discusses each checklist item and gives methodological background and published examples of transparent reporting. The STROBE checklist is best used in conjunction with this article (freely available on the Web sites of PLoS Medicine at <http://www.plosmedicine.org/>, Annals of Internal Medicine at <http://www.annals.org/>, and Epidemiology at <http://www.epidem.com/>). Information on the STROBE Initiative is available at [www.strobe-statement.org](http://www.strobe-statement.org).



# BMJ Open

## Shingles, Zostavax vaccination and risk of developing dementia: a nested case-control study - results from the UK Biobank cohort.

|                                 |                                                                                                                                                                                                                                                                                                                                                                                                                                                                                                                                                                                                                           |
|---------------------------------|---------------------------------------------------------------------------------------------------------------------------------------------------------------------------------------------------------------------------------------------------------------------------------------------------------------------------------------------------------------------------------------------------------------------------------------------------------------------------------------------------------------------------------------------------------------------------------------------------------------------------|
| Journal:                        | <i>BMJ Open</i>                                                                                                                                                                                                                                                                                                                                                                                                                                                                                                                                                                                                           |
| Manuscript ID                   | bmjopen-2020-045871.R1                                                                                                                                                                                                                                                                                                                                                                                                                                                                                                                                                                                                    |
| Article Type:                   | Original research                                                                                                                                                                                                                                                                                                                                                                                                                                                                                                                                                                                                         |
| Date Submitted by the Author:   | 12-Aug-2021                                                                                                                                                                                                                                                                                                                                                                                                                                                                                                                                                                                                               |
| Complete List of Authors:       | Lophatananon, Artitaya ; UoM, Division of Population Health, Health Services Research and Primary Care<br>Mekli, Krisztina; UoM, Division of Population Health, Health Services Research and Primary Care<br>Cant, Rachel; The University of Manchester, Division of Pharmacy & Optometry<br>Burns, Alistair; UoM, School of Community Based Medicine<br>Dobson, Curtis; The University of Manchester, Division of Pharmacy & Optometry<br>Itzhaki, Ruth; University of Oxford, The Oxford Institute of Population Ageing<br>Muir, Kenneth; UoM, Division of Population Health, Health Services Research and Primary Care |
| <b>Primary Subject Heading</b>: | Epidemiology                                                                                                                                                                                                                                                                                                                                                                                                                                                                                                                                                                                                              |
| Secondary Subject Heading:      | Public health                                                                                                                                                                                                                                                                                                                                                                                                                                                                                                                                                                                                             |
| Keywords:                       | Dementia < NEUROLOGY, EPIDEMIOLOGY, Public health < INFECTIOUS DISEASES                                                                                                                                                                                                                                                                                                                                                                                                                                                                                                                                                   |
|                                 |                                                                                                                                                                                                                                                                                                                                                                                                                                                                                                                                                                                                                           |

SCHOLARONE™  
Manuscripts

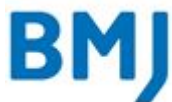

I, the Submitting Author has the right to grant and does grant on behalf of all authors of the Work (as defined in the below author licence), an exclusive licence and/or a non-exclusive licence for contributions from authors who are: i) UK Crown employees; ii) where BMJ has agreed a CC-BY licence shall apply, and/or iii) in accordance with the terms applicable for US Federal Government officers or employees acting as part of their official duties; on a worldwide, perpetual, irrevocable, royalty-free basis to BMJ Publishing Group Ltd ("BMJ") its licensees and where the relevant Journal is co-owned by BMJ to the co-owners of the Journal, to publish the Work in this journal and any other BMJ products and to exploit all rights, as set out in our [licence](#).

The Submitting Author accepts and understands that any supply made under these terms is made by BMJ to the Submitting Author unless you are acting as an employee on behalf of your employer or a postgraduate student of an affiliated institution which is paying any applicable article publishing charge ("APC") for Open Access articles. Where the Submitting Author wishes to make the Work available on an Open Access basis (and intends to pay the relevant APC), the terms of reuse of such Open Access shall be governed by a Creative Commons licence – details of these licences and which [Creative Commons](#) licence will apply to this Work are set out in our licence referred to above.

Other than as permitted in any relevant BMJ Author's Self Archiving Policies, I confirm this Work has not been accepted for publication elsewhere, is not being considered for publication elsewhere and does not duplicate material already published. I confirm all authors consent to publication of this Work and authorise the granting of this licence.

1  
2  
3 **Shingles, Zostavax vaccination and risk of developing dementia: a nested case-control**  
4 **study - results from the UK Biobank cohort.**  
5  
6  
7

8 Artitaya Lophatananon (Ph.D.)<sup>1</sup>, Krisztina Mekli (Ph.D.)<sup>1</sup>, Rachel Cant (Ph.D.)<sup>2</sup>, Alistair Burns  
9 (CBE FRCP)<sup>3</sup>, Curtis Dobson (Ph.D.)<sup>2,5</sup>, Ruth Itzhaki (Ph.D.)<sup>4,5</sup>, Kenneth R Muir (Ph.D.)<sup>1,5\*</sup>  
10  
11  
12

13 <sup>1</sup> Division of Population Health, Health Services Research and Primary Care, School of Health  
14 Sciences, Faculty of Biology, Medicine and Health, The University of Manchester, Manchester,  
15 M13 9PT  
16  
17  
18

19 <sup>2</sup> Division of Pharmacy & Optometry, School of Health Sciences, Faculty of Biology, Medicine  
20 and Health, The University of Manchester, M13 9PT  
21  
22  
23

24 <sup>3</sup> Division of Neuroscience & Experimental Psychology, School of Biological Sciences, Faculty  
25 of Biology, Medicine and Health, The University of Manchester, M13 9PT  
26  
27  
28

29 <sup>4</sup> The Oxford Institute of Population Ageing, University of Oxford, Oxford, OX2 6PR  
30  
31  
32

33 <sup>5</sup> Joint senior author  
34  
35  
36

37 \*Corresponding author E-mail address: [kenneth.muir@manchester.ac.uk](mailto:kenneth.muir@manchester.ac.uk)  
38  
39  
40  
41  
42  
43  
44  
45  
46  
47  
48  
49  
50  
51  
52  
53  
54  
55  
56  
57  
58  
59  
60

## Abstract

Objectives: To investigate the association between shingles and dementia, and between Zostavax vaccination and dementia.

Design: Nested case-control study.

Settings: Data were drawn from the UK Biobank cohort study with a total of 228,223 participants with hospital episode statistics and primary care linkage health records.

Participants: The analyses included 2,378 incident dementia cases and 225,845 controls.

Inclusion criteria for incident cases was a dementia diagnosis 3 years or more after the first assessment date derived from all sources including ICD10, 9, self-report and primary care linkage records. Subjects with no dementia code from all sources were coded as controls. Both shingles and Zostavax vaccination were investigated for their association with dementia risk.

Results: There was a small but non-significant increase in the risk of dementia in subjects with shingles diagnosed 3 years or more prior to dementia diagnosis (OR 1.088 with 95% C.I. 0.978-1.211). In those subjects who had had Zostavax vaccination, the risk of dementia was significant decreased (OR 0.808 with 95% C.I. 0.657 to 0.993).

Conclusion: A history of shingles was not associated with an increased risk of dementia. In subjects who were eligible for the immunisation and vaccinated with Zostavax we saw reduced risk of developing dementia.

Word count: 200

## Article summary

### Strengths and limitations of this study

1. This study used a subset of UKBiobank cohort and disease outcomes and exposures were ascertained through sources including the Hospital Episodes Statistics (HES) primary care data linkage.

1  
2  
3  
4  
5  
6 2. As VZV is the only herpesvirus for which an effective vaccine (Zostavax) is approved, we  
7 have also been able, to establish whether vaccination against a herpesvirus influences dementia.  
8

9  
10 3. The analysis of vaccination was based only in eligible subjects.  
11

12 4. This study inherits some weakness in that the UK Biobank study participants are not fully  
13 representative of the UK population, as suggested by low prevalence of dementia compared to  
14 the general population.  
15  
16

17  
18 5. We did not investigate other type of herpes viruses that may also play role in dementia  
19 aetiology.  
20  
21  
22  
23  
24  
25  
26  
27  
28  
29  
30  
31  
32  
33  
34  
35  
36  
37  
38  
39  
40  
41  
42  
43  
44  
45  
46  
47  
48  
49  
50  
51  
52  
53  
54  
55  
56  
57  
58  
59  
60

## Introduction

The number of people worldwide afflicted with Alzheimer's disease (AD) or dementia of other types is high – AD being estimated to be currently at least 30 million, and by 2150 predicted to exceed 152 million. The recent Lancet Commission on dementia has highlighted potentially reversible causes<sup>1</sup>. Despite many years of research into the role of beta amyloid, the main component of the characteristic plaques seen in AD brains, no significant advances confirming a role for beta amyloid in causing the disease, or in the treatment of AD have yet been made. One unrelated possibility gaining increasing attention is whether viruses may have a role in initiating or aiding the development of dementia. For example, we previously proposed that herpes simplex virus type 1 (HSV1), which is present in latent form in the post mortem brains of elderly people, causes both direct viral damage and inflammation on reactivation, and that this damage accumulates over time, potentially leading to the development of AD<sup>2 3</sup>.

The possibility of involvement of other herpesviruses in the disease and in dementia has also been investigated, albeit to a much lesser extent. Cytomegalovirus has been suggested to cause immune dysregulation, thereby leading to reactivation of latent HSV1<sup>4 5</sup>. The potential role of Varicella-zoster virus (VZV), another herpesvirus, in dementia has rarely been considered. However, it is very common, infecting most people in childhood, with the primary infection resulting in chicken pox. The virus, remains latent in the body lifelong, in the case of VZV, it persists in the cranial nerves and dorsal root ganglia. Reactivation causes herpes zoster, known more commonly as shingles, which appears as a painful rash usually on one side of the torso.

The main risk factor for shingles, as with dementia, is increasing age. The reactivated virus can enter the brain, causing a productive infection, inflammation and cell death, as well as long-term effects in some cases such as cognitive decline. An early investigation of brain from AD patients and age-matched controls was unable to detect VZV DNA in brain of either group<sup>3</sup>, but this result has not since been confirmed or disproved by PCR searches of greater sensitivity. However, even if VZV is not present in brain, this does not preclude its having a role in AD, as VZV reactivation in the periphery could have an effect on the central nervous system (CNS).

1  
2  
3 In a study aiming to investigate any links between shingles and three amyloid-associated  
4 diseases of aging including AD, Bubak et al (2020)<sup>6</sup> found that herpes zoster plasma has  
5 significantly higher levels of beta amyloid and amylin than have controls, and that addition of  
6 exogenous beta amyloid or amylin causes increases amyloid aggregation. The authors concluded  
7 that shingles might accelerate progression of these diseases via aggregation of beta amyloid.  
8  
9

10  
11  
12  
13 In this study, we investigated whether there was an association between shingles and risk of  
14 developing dementia in the UK Biobank cohort. Zostavax vaccination, which is used to prevent  
15 shingles (zoster) and zoster-related post-herpetic neuralgia, has been offered routinely by the  
16 NHS from 2013 for people aged 70-80. The uptake was initially 61.8% although it has declined  
17 more recently (42.8% in 2016/17)<sup>7</sup>. VZV is the only herpesvirus for which an effective vaccine  
18 is currently approved, and so for the first time the possible impact on dementia risk of  
19 vaccination against a herpesvirus was investigated also.  
20  
21  
22  
23  
24  
25  
26

## 27 **Methodology**

### 28 **Study design**

29 A nested case-control study.  
30  
31  
32  
33

### 34 **Cohort description**

35 The UK Biobank (UKB) is a national cohort with half a million participants (both males and  
36 females) aged between 39 to 71 years. Participants were recruited in 2006-2010, aged 40-69  
37 years at the time and continued to be longitudinally followed to capture subsequent health  
38 events. More details can be found at <http://www.ukbiobank.ac.uk/>. Participants consented to the  
39 UK Biobank for their data and /or samples to be used for health-related research purposes. Ethics  
40 approved for UK Biobank was obtained from the North West- Haydock research ethics  
41 committee (REC reference: 16/NW/0274). All findings were deposited within the UK Biobank  
42 website as a way of dissemination to all participants and other researchers. This study is based on  
43 a subset of the entire cohort for which primary care data linkage is available. We excluded any  
44 participants who informed the UKB of their withdrawal prior to assemble our final dataset. The  
45 dataset contained 228,930 eligible participants.  
46  
47  
48  
49  
50  
51  
52  
53  
54  
55  
56  
57  
58  
59  
60

## **Dementia case identification**

### **ICD 10 and 9**

The ICD 10 and 9 codes for dementia were obtained from the publication by Wilkinson et al<sup>8</sup>. The ICD 10 has 212 data fields (follow-up data) and the ICD 9 has 46 data fields (follow-up data). Our analysis used data available up to 31<sup>st</sup> January 2020. Information on the date when the codes were recorded was available for each follow-up. For subjects with any of the dementia codes appearing more than once, the earliest diagnosis date was used.

### **Primary Care record linkage**

Data from Primary Care linkage was available in 45% of the UK Biobank participants at the time of this analysis. There are two versions of medical Read codes available in the UKB: version 2 (v2) and version 3 (ctV3 or v3). Both versions provide a standard vocabulary for clinicians to record patient findings and procedures, in health and social care IT systems across primary and secondary care within the National Health Service (NHS) in the UK.

First, we applied the dementia medical Read code version 2 listed in the article by Wilkinson<sup>8</sup>. We further mapped read code version 2 with version 3 using the mapping file. This mapping file was provided by the UKB. The mapping file allows the specific code to be mapped across different platforms. We then generated Structured Query Language (SQL) to extract data from the UKB portal. The date on when dementia was recorded was also extracted. This enabled us to define if the case was an incident or prevalent case. For individuals where dementia codes appeared more than once, the record with the earliest date was kept (first time of diagnosis).

All dementia cases across all data sources were then further classified into one of the following: incident or prevalent cases and controls.

### **Criteria for case and control identification**

For incident cases, subjects had to fulfil both of the following criteria 1) dementia diagnosis occurred 3 years or more after the first assessment date and 2) subjects with a dementia code from any sources. Prevalent cases that had already been diagnosed was excluded (707 prevalent cases). For controls, subjects with no dementia code from all sources were coded as controls.



### **Shingles identification**

We used three sources to derive shingles variable including ICD10, 9 and Primary Care record linkage. We used the same approach to identify shingles cases and further applied a 3-year window prior to age at dementia diagnosis for cases and age at last follow up for controls. In subjects who had shingles diagnosis more than once, the first diagnosis was used. Shingles variable was coded as binary (yes/no).

### **Zostavax vaccination**

We investigated the association of shingles and dementia in this sub-cohort of subjects who were eligible for Zostavax vaccination (vaccine used to prevent shingles and zoster-related post-herpetic neuralgia). Data were extracted from the Primary Care linkage record only. The code provided by the UKB was used to identify Zostavax vaccination including date of event.

Zostavax vaccine was available within the NHS from 2013 onwards for people age 70 and over. We therefore computed the age of subjects in 2013 and included only those with age 70+ in this analysis. Zostavax vaccination variable was coded as binary (yes/no).

### **Patient and Public Involvement**

There is no patient or public involvement in this study as we analysed dataset obtained from the UK Biobank.

### **Statistical analysis**

Logistic regression analysis was performed using Stata version 15.0<sup>9</sup>. Odds ratios (ORs) and 95% confidence intervals (CIs) were estimated. A significant odds ratio is considered when 95% CI does not include 1. For shingles and Zostavax vaccination variable, “no” category was used as reference category. We fitted age (at diagnosis for cases and until last follow up in 2017 for controls) and gender as confounding factors for shingles and a dementia outcome. Each potential confounder was tested and had to satisfy two criteria if they were to be defined as a confounder.

Criterion 1: among the unexposed (subjects with no shingles code), there should be an association between the confounder and the dementia outcome.

Criterion 2: the potential confounder must be associated with the main exposure (shingles), but not as a result of the exposure. To achieve this, we tested the association between the confounder and shingles in the control population.

Our analysis suggested that both age and sex are confounding factors. For Zostavax vaccination, we added shingles and Charlson co-morbidity index (CCI), age at vaccination and sex in the model. The CCI was generated based on the code developed recently by Ludvigsson et al.<sup>10</sup> Both CCI and age at vaccination were also confirmed as confounding factors. To compare mean difference of age between non-dementia and dementia group, we used Student t-test. To explore the distribution of sex, shingles between non-dementia and dementia group, we used chi-square test. P-value <0.05 is considered as statistical significance.

## Results

There were 2,378 incident cases and 225,845 controls, with dementia cases on average being older than controls (see Table 1). The Student t-test suggested this difference was significant (P-value <0.05). The number of female participants was slightly higher than males (54.41% female and 45.59% male - see Table 2). There were however more males than females in the incident group. The total number of participants who had shingles was 35,116 (or 15.39%) (Table 3). There were 18% of dementia cases with shingles as compared to 15% of controls. Results from Chi-square test suggested a significant difference in distribution of shingles between dementia cases and controls (P-value <0.05).

**Table 1 Summary statistics showing age of control and incident (dementia) cases**

| Group                   | N      | Mean  | SD   | Min   | Max   |
|-------------------------|--------|-------|------|-------|-------|
| Incident dementia cases | 2378   | 68.91 | 6.51 | 44.00 | 79.00 |
| Controls (No dementia)  | 225845 | 65.35 | 8.07 | 46.00 | 81.00 |

*Student-t test p-value 0.0000*

**Table 2 Distribution of gender in the control and incident (dementia) groups**

| Sex    | Incident dementia Cases (%) | Controls (No dementia) (%) | Total           |
|--------|-----------------------------|----------------------------|-----------------|
| Female | 1187 (49.92)                | 123685 (54.77)             | 124872 (54.71)  |
| Male   | 1191 (50.08)                | 102160 (45.55)             | 103351 (45.29)  |
| Total  | 2378 (100.00)               | 225845 (100.00)            | 228223 (100.00) |

*Pearson chi-square = 22.36 P-value <0.05*

**Table 3 Distribution of shingles for the case control and incident (dementia) case groups.**

| Shingles | Incident dementia cases (%) | Controls (No dementia) (%) | Total (%)       |
|----------|-----------------------------|----------------------------|-----------------|
| No       | 1954 (82.41)                | 191066 (84.63)             | 193020 (84.61)  |
| Yes      | 417 (17.59)                 | 34699 (15.37)              | 35116 (15.39)   |
| Total    | 2371 (100.00)               | 225765 (100.00)            | 228136 (100.00) |

*Pearson chi-square = 8.863 P-value <0.05*

After adjusting for age and sex, there was a small but non-significant increase in the risk of dementia in subjects with shingles diagnosed 3 years or more prior to dementia diagnosis (OR 1.088 with 95%C.I. 0.978-1.211) (Table 4).

**Table 4 Estimated risk of dementia with or without > 3 year prior shingles diagnosis.**

| Shingles | Odds ratio* | [95% Confident Interval] |       | Odds ratio# | [95% Confident Interval] |       |
|----------|-------------|--------------------------|-------|-------------|--------------------------|-------|
| No       | 1.000       |                          |       |             |                          |       |
| Yes      | 1.175       | 1.057                    | 1.307 | 1.088       | 0.978                    | 1.211 |

\*Unadjusted #adjusted for age and sex

To examine the effect of Zostavax vaccination on dementia, we included eligible subjects for Zostavax vaccine (Table 5). Age at vaccination and Charlson co-morbidity index as continuous variables showed an increased dementia risk by 18% and 49% respectively. Results show that in subjects who had had dementia, an inverse association suggesting decreased risk was observed for subjects who had been vaccinated (OR 0.808 with 95%C.I. 0.657 to 0.993).

**Table 5 Estimated risk of dementia with or without > 3 year prior shingles diagnosis, in subjects with and without vaccination.**

| Variables                   | OR    | 95% Confident Interval |       |
|-----------------------------|-------|------------------------|-------|
| Age at vaccination          | 1.182 | 1.137                  | 1.228 |
| Female                      | -Ref- |                        |       |
| Male                        | 1.044 | 0.925                  | 1.177 |
| Not affected by shingles    | -Ref- |                        |       |
| Affected by Shingles        | 0.886 | 0.755                  | 1.04  |
| Charlson co-morbidity index | 1.489 | 1.446                  | 1.534 |
| Zostavax vaccination- No    | -Ref- |                        |       |
| -Yes                        | 0.808 | 0.657                  | 0.993 |

## Discussion

1  
2  
3 In this study, we found a significant difference in distribution of shingles between dementia  
4 incident cases and controls in a sub-cohort where medical record was available from both  
5 hospital episode statistics and primary care linkage. These data sources provided us with a more  
6 complete data for both dementia outcome and shingles exposure. Our finding suggests that there  
7 was a small but non-significant increase in the risk of dementia in subjects with shingles  
8 diagnosed 3 years or more prior to dementia diagnosis after adjust for age and sex. This is  
9 despite that fact that VZV has been suggested as a direct cause of dementia or that shingles  
10 causes inflammation in the periphery that might lead to brain inflammation and possible  
11 reactivation of HSV1 and/or that VZV, like CMV, causes immune dysregulation as suggested for  
12 the role of CMV in AD, by Stowe et al. (2012)<sup>4</sup> and Westman et al. (2014)<sup>5</sup>. Indeed, results from  
13 large cohort study using data from the Korean National Health Insurance Service of about 1.14M  
14 participants suggested similar findings to our study (OR 0.90 with 95% C.I. 0.84-0.97)<sup>11</sup>.

15  
16 We analysed a sub-cohort of the entire UKB from which health records from HES and primary  
17 care were available. These health records enabled us to capture shingles, Zostavax vaccination  
18 and dementia diagnosis.

19  
20 In our analysis, we opted to restrict the date of shingles diagnosis to those who were diagnosed 3  
21 years prior to dementia diagnosis, to minimise possible detection bias from too short an exposure  
22 time prior to study outcome. Similarly, for dementia incident cases, we used a diagnosis date of 3  
23 years after their first attendance date. This was done to minimise likelihood of including  
24 prevalent cases of dementia. This approach has been used previously for dementia outcomes in  
25 the UKB dataset<sup>12</sup>.

26  
27 In the United Kingdom (UK) the incidence of HZ increases from 7.1 per 1000 person-years  
28 among 60–64 year olds to 12.2 per 1000 among individuals aged  $\geq 85$ <sup>13</sup>. The lifetime risk of HZ  
29 is around 10–30%<sup>14</sup>. People with a weakened immune system are at higher risk of shingles.  
30 Neurological sequelae in shingles sufferers range from mild to severe in immunocompetent  
31 patients to extremely severe and even fatal, in immunocompromised people. Several studies have  
32 evaluated changes in cognition after the very rare disease herpes zoster encephalitis (HZE),  
33 and/or other neuropsychiatric sequelae<sup>15-17</sup>. Antiviral treatment with acyclovir or valacyclovir  
34 was used in every study apart from that of Appelbaum et al.<sup>15</sup>, who used "no specific therapy".  
35 The results were variable, Wetzel et al. (2002)<sup>17</sup> detecting no change (apart from possible  
36  
37  
38  
39  
40  
41  
42  
43  
44  
45  
46  
47  
48  
49  
50  
51  
52  
53  
54  
55  
56  
57  
58  
59  
60

1  
2  
3 impairment of "visuo-constructive abilities"), whereas the others found appreciable  
4 deterioration; however, all these studies used only very small numbers of patients, of variable  
5 ages, and variable periods of assessment after the acute disease. More recently, Grahn et al  
6 (2013)<sup>18</sup> investigated 14 patients, age range 19 to 83, three years after the acute disease, and  
7 found that the patients showed signs of long-term cognitive impairment in the domains of speed  
8 and attention, memory and learning and executive function; also, a greater proportion of VZV  
9 patients was classified with mild cognitive impairment (MCI), compared with 28 controls,  
10 matched for age and gender.  
11

12  
13 Two recent population epidemiological studies in Taiwan on VZV and dementia/AD implicated  
14 VZV in the disease<sup>19,20</sup>. Investigations were made using the Taiwan National Health Insurance  
15 Research Database, which operated from 1995 and to which 99.9% of the population subscribed  
16 (by 2014). The first study<sup>19</sup> investigated 846 patients with herpes zoster ophthalmicus (HZO),  
17 mean age 61.6 years, and 2538 age-matched comparison patients. The patients were identified by  
18 first-time principal diagnosis in clinics or in hospitals, and the comparison patients were selected  
19 by matching them with a given HZO patient in their usage of medical services in the same index  
20 year. The incidences rates of senile dementia were investigated within the 5-year period after  
21 their index dates. The covariate-adjusted HR of dementia was found to be 2.97 (95% CI, 1.90-  
22 4.67), revealing that the risk of developing dementia was high in HZO patients (no details of any  
23 antiviral treatment were provided).  
24  
25

26  
27 In the second study<sup>20</sup>, Chen et al compared almost 40,000 patients diagnosed with herpes zoster  
28 with the same number of controls, aged 50-90 years in the period 1997-2013, the mean follow-up  
29 period being 6 years. The definition of herpes zoster was based on at least one inpatient and/or  
30 outpatient diagnosis. The incidence of senile dementia was found to be slightly higher than that  
31 of controls (HR 1.11, 95% CI: 1.04-1.17). However, comparing VZV patients treated with  
32 antivirals with untreated patients, the risk of SD was greatly diminished (adjusted relative risk,  
33 0.55, 95% CI 0.34-0.65). Thus, in contrast to the HZO result, the increased risk of SD was low in  
34 HZ patients, yet antiviral treatment was highly protective.  
35  
36

37  
38 Direct comparisons cannot be made between our results and those of Chen et al because all the  
39 patients in the UK shingles group would almost certainly have been treated with antivirals,  
40 whereas only about 5% of the Taiwanese shingles patients were treated thus. Chen et al. were  
41  
42  
43  
44  
45  
46  
47  
48  
49  
50  
51

1  
2  
3 therefore able to compare not only risk of dementia for shingles patients - mostly untreated - with  
4 matched controls, but also risk for antiviral-treated shingles patients compared with untreated  
5 shingles patients. Surprisingly though, in our study the risk of dementia for shingles patients is  
6 higher rather than lower than in the Taiwan study. Whether this results from differences in  
7 ethnicity is unknown. A further possible explanation is that the difference relates to adjustment  
8 for additional variables in in the Chen analyses.  
9

10  
11  
12 We sought possible effects of vaccination with Zostavax. In our study, subjects who had been  
13 vaccinated showed the inverse effect, with a decreased dementia risk of around 20%.

14  
15  
16 Our findings suggest that this group may be protected from dementia in the future. There is a  
17 possibility that healthy people tend to seek vaccination therefore in our analysis we adjusted for  
18 Charlson co-morbidity index.  
19

20  
21  
22 VZV might have either a direct or an indirect involvement in dementia, indirect in causing  
23 neuroinflammation and subsequent reactivation of HSV1 in brain, with consequent damage, so  
24 that the protective effect of vaccination against shingles on subsequent incidence of dementia  
25 could be attributed to a decreased occurrence of HSV1 reactivation in brain. We suggested this  
26 explanation in a previous comment<sup>21</sup> on the observed protective effect against AD of vaccines  
27 against diphtheria, tetanus, poliomyelitis and influenza <sup>22</sup>. In fact, a further example has been  
28 noted very recently, namely, vaccination against BCG, which showed that neuropsychiatric  
29 symptoms can occur even if a putative pathogen is not present in brain<sup>23 24</sup>.  
30

31  
32  
33 The fact that shingles causes only a small, non-significant risk of dementia, yet vaccination  
34 against shingles is protective, seems at first sight to be paradoxical. Possibly the risk of shingles  
35 found here is an under-estimate, or else it might be that the reduced risk for those vaccinated is  
36 attributable to off-target effects, as found for several other vaccines - affecting the immune  
37 system and subsequently, reactivation of HSV1, as suggested.  
38

39  
40  
41 Our study has inherent strengths and weaknesses. The UKB is a national cohort of half a million  
42 people with an average follow up of almost 12 years (up until 2020). Disease outcome was  
43 ascertained by robust sources including the Hospital Episodes Statistics (HES) and through  
44 primary care data linkage. Although the primary care data linkage covered 45% of participants at  
45 the time of data analysis, this source of data has the benefit of capturing mild symptom shingles  
46  
47  
48  
49  
50  
51  
52  
53  
54  
55  
56  
57  
58  
59  
60

1  
2  
3 cases. Most people suffering from shingles seeks medical advice/treatment first from their GP  
4 prior to referral to hospital for further treatments, particularly with some severe cases, hence  
5 these data have enabled us to capture shingles cases in the community. We were able to  
6 demonstrate the effect of shingles immunisation and dementia risk. The weaknesses include the  
7 fact that the UKB entire cohort consists of only 1.12% of all dementia cases with age of 65 and  
8 over, which is far less than the national figure prevalence of dementia - 7.1% for the total age-  
9 standardised 65+ population (based on 2013 data)<sup>25</sup>. The diagnoses are also based on records  
10 rather than direct patient contact (although the validity seems satisfactory).  
11  
12  
13  
14  
15  
16

17 It is to be noted that the UKB participants are in general healthier, less obese and smoke less than  
18 people in the general population. It was also reported that UKB participants suffered less heart  
19 and kidney disease and cancer as compared to the national figures<sup>26</sup>. This has led to a non-  
20 representative of the sampling population, a so-called a “healthy volunteer” selection bias.  
21  
22  
23  
24

25 We did not take any anti-herpetic treatments into account which could potentially have an effect  
26 on dementia risk if shingles occurred long before dementia diagnosis. Also, we did not include  
27 other types of herpesvirus in our analysis.  
28  
29  
30

### 31 **Conclusion**

32  
33 Our study suggests a potential effect of Zostavax vaccination in reducing the risk of dementia.  
34 Future studies should examine the possible causal pathway between shingles vaccination and  
35 dementia.  
36  
37  
38

### 39 **Acknowledgment**

40  
41 We would like to thank all the UKB participants and staffs for making this study possible  
42 (Application number 5864).  
43  
44  
45

### 46 **Funding**

47  
48 We would like to thank the Advantage Foundation for funding this work. KM and AL are also  
49 funded by the Alan Turing Institute under the EPSRC grant EP/N510129/1.  
50  
51

### 52 **Role of sponsor**

53  
54 Sponsor has no role in study design, data acquisition or involve in any process of data analysis.  
55  
56  
57  
58  
59  
60

## License

The Corresponding Author has the right to grant on behalf of all authors and does grant on behalf of all authors, an exclusive licence (or non exclusive for government employ-ees) on a worldwide basis to the BMJ Publishing Group Ltd (“BMJ”), and its Licencees to permit this article (if accepted) to be published in The BMJ’s editions and any other BMJ products and to exploit all subsidiary rights, as set out in our licence.”

## Conflict of Interest

There is no competing interest.

## Author contributions

RI, CD and KM were involved in study conception, idea and design. KM, AL, AB and KM were involved in data acquisition and data quality check. AL carried out data analysis. AL, KM, RC, RI, CD carried out interpretation of the results. All authors involved in drafting and approved the final version of the manuscript. KM is the study guarantor.

## Data Availability

Upon publishing this article, we have fulfilled our proposed work agreement with the UK Biobank and have returned our data that we used for these analyses to the UK Biobank as part of the agreement. However, the data from the UK Biobank ([www.ukbiobank.ac.uk](http://www.ukbiobank.ac.uk)) are third party and their legal agreement means that we do not have permission to share the data. The UK Biobank data used in this study can however be accessed by applying through the UK Biobank Access Management System ([www.ukbiobank.ac.uk/register-apply](http://www.ukbiobank.ac.uk/register-apply)).

## Ethics Statement

Ethics approved for UK Biobank was obtained from the North West- Haydock research ethics committee (REC reference: 16/NW/0274).



## References

1. Livingston G, Huntley J, Sommerlad A, et al. Dementia prevention, intervention, and care: 2020 report of the Lancet Commission. *Lancet (London, England)* 2020 doi: 10.1016/s0140-6736(20)30367-6 [published Online First: 2020/08/03]
2. Jamieson GA, Maitland NJ, Wilcock GK, et al. Latent herpes simplex virus type 1 in normal and Alzheimer's disease brains. *Journal of medical virology* 1991;33(4):224-7. [published Online First: 1991/04/01]
3. Itzhaki RF, Lin WR, Shang D, et al. Herpes simplex virus type 1 in brain and risk of Alzheimer's disease. *Lancet (London, England)* 1997;349(9047):241-4. doi: 10.1016/s0140-6736(96)10149-5 [published Online First: 1997/01/25]
4. Stowe RP, Peek MK, Cutchin MP, et al. Reactivation of herpes simplex virus type 1 is associated with cytomegalovirus and age. *Journal of medical virology* 2012;84(11):1797-802. doi: 10.1002/jmv.23397 [published Online First: 2012/09/22]
5. Westman G, Berglund D, Widén J, et al. Increased inflammatory response in cytomegalovirus seropositive patients with Alzheimer's disease. *PloS one* 2014;9(5):e96779. doi: 10.1371/journal.pone.0096779 [published Online First: 2014/05/09]
6. Bubak AN, Beseler C, Como CN, et al. Acute zoster plasma contains elevated amyloid, correlating with A $\beta$ 42 and amylin levels, and is amyloidogenic. *Journal of neurovirology* 2020 doi: 10.1007/s13365-020-00830-7 [published Online First: 2020/05/10]
7. Dowden A. Is the UK shingles vaccination programme fit for the future? *Prescriber* 2018;29(7):23-26. doi: 10.1002/psb.1688
8. Wilkinson T, Schnier C, Bush K, et al. Identifying dementia outcomes in UK Biobank: a validation study of primary care, hospital admissions and mortality data. *Eur J Epidemiol* 2019;34(6):557-65. doi: 10.1007/s10654-019-00499-1 [published Online First: 2019/02/27]
9. StataCorp. Stata Statistical Software: Release 15. *College Station, TX: StataCorp LLC* 2017
10. Ludvigsson JF, Appelros P, Askling J, et al. Adaptation of the Charlson Comorbidity Index for Register-Based Research in Sweden. *Clinical epidemiology* 2021;13:21-41. doi: 10.2147/clep.S282475 [published Online First: 2021/01/21]
11. Choi HG, Park BJ, Lim JS, et al. Herpes Zoster Does Not Increase the Risk of Neurodegenerative Dementia: A Case-Control Study. *American journal of Alzheimer's disease and other dementias* 2021;36:15333175211006504. doi: 10.1177/15333175211006504 [published Online First: 2021/04/23]
12. Calvin CM, Wilkinson T, Starr JM, et al. Predicting incident dementia 3-8 years after brief cognitive tests in the UK Biobank prospective study of 500,000 people. *Alzheimer's & Dementia* 2019;15(12):1546-57. doi: <https://doi.org/10.1016/j.jalz.2019.07.014>

- 1  
2  
3 13. Curran D, Hunjan M, El Ghachi A, et al. Herpes zoster related healthcare burden and costs in  
4 immunocompromised (IC) and IC-free populations in England: an observational  
5 retrospective database analysis. *BMJ Open* 2019;9(8):e023502. doi: 10.1136/bmjopen-  
6 2018-023502  
7
- 8  
9 14. Thomas SL, Hall AJ. What does epidemiology tell us about risk factors for herpes zoster?  
10 *The Lancet Infectious diseases* 2004;4(1):26-33. doi: 10.1016/s1473-3099(03)00857-0  
11 [published Online First: 2004/01/15]  
12
- 13 15. Appelbaum E, Kreps SI, Sunshine A. Herpes zoster encephalitis. *The American journal of*  
14 *medicine* 1962;32:25-31. doi: 10.1016/0002-9343(62)90179-1 [published Online First:  
15 1962/01/01]  
16
- 17 16. Hokkanen L, Launes J, Poutiainen E, et al. Subcortical type cognitive impairment in herpes  
18 zoster encephalitis. *Journal of neurology* 1997;244(4):239-45. doi:  
19 10.1007/s004150050078 [published Online First: 1997/04/01]  
20
- 21 17. Wetzel K, Asholt I, Herrmann E, et al. Good cognitive outcome of patients with herpes  
22 zoster encephalitis: a follow-up study. *Journal of neurology* 2002;249(11):1612-4. doi:  
23 10.1007/s00415-002-0874-2 [published Online First: 2003/01/21]  
24
- 25 18. Grahn BH, Bauer B, Silver T. Diagnostic ophthalmology. *The Canadian veterinary journal*  
26 = *La revue veterinaire canadienne* 2013;54(1):86-7. [published Online First: 2013/07/03]  
27
- 28 19. Tsai MC, Cheng WL, Sheu JJ, et al. Increased risk of dementia following herpes zoster  
29 ophthalmicus. *PloS one* 2017;12(11):e0188490. doi: 10.1371/journal.pone.0188490  
30 [published Online First: 2017/11/23]  
31
- 32 20. Chen VC, Wu SI, Huang KY, et al. Herpes Zoster and Dementia: A Nationwide Population-  
33 Based Cohort Study. *The Journal of clinical psychiatry* 2018;79(1) doi:  
34 10.4088/JCP.16m11312 [published Online First: 2017/12/16]  
35
- 36 21. Itzhaki RF, Dobson CB. Alzheimer's disease and herpes. *CMAJ : Canadian Medical*  
37 *Association journal = journal de l'Association medicale canadienne* 2002;167(1):13.  
38 [published Online First: 2002/07/26]  
39
- 40 22. Verreault R, Laurin D, Lindsay J, et al. Past exposure to vaccines and subsequent risk of  
41 Alzheimer's disease. *CMAJ : Canadian Medical Association journal = journal de*  
42 *l'Association medicale canadienne* 2001;165(11):1495-8. [published Online First:  
43 2002/01/05]  
44
- 45 23. Helms J, Kremer S, Merdji H, et al. Neurologic Features in Severe SARS-CoV-2 Infection.  
46 *The New England journal of medicine* 2020;382(23):2268-70. doi:  
47 10.1056/NEJMc2008597 [published Online First: 2020/04/16]  
48
- 49 24. McManus RM, Heneka MT. Role of neuroinflammation in neurodegeneration: new insights.  
50 *Alzheimer's research & therapy* 2017;9(1):14. doi: 10.1186/s13195-017-0241-2  
51 [published Online First: 2017/03/06]  
52  
53  
54  
55  
56  
57  
58  
59

- 1  
2  
3 25. Prince M, Knapp M, Guerchet M, et al. Dementia UK: Update Second Edition report ed,  
4 2014.  
5  
6  
7 26. Fry A, Littlejohns TJ, Sudlow C, et al. Comparison of Sociodemographic and Health-Related  
8 Characteristics of UK Biobank Participants With Those of the General Population.  
9 *American Journal of Epidemiology* 2017;186(9):1026-34. doi: 10.1093/aje/kwx246.  
10  
11  
12  
13  
14  
15  
16  
17  
18  
19  
20  
21  
22  
23  
24  
25  
26  
27  
28  
29  
30  
31  
32  
33  
34  
35  
36  
37  
38  
39  
40  
41  
42  
43  
44  
45  
46  
47  
48  
49  
50  
51  
52  
53  
54  
55  
56  
57  
58  
59  
60

STROBE Statement—checklist of items that should be included in reports of observational studies

|                           | <b>Item No.</b> | <b>Recommendation</b>                                                                               | <b>Page No.</b> | <b>Relevant text from manuscript</b>                                                                                                                                                                                                                                                                                                                                                                                                                        |
|---------------------------|-----------------|-----------------------------------------------------------------------------------------------------|-----------------|-------------------------------------------------------------------------------------------------------------------------------------------------------------------------------------------------------------------------------------------------------------------------------------------------------------------------------------------------------------------------------------------------------------------------------------------------------------|
| <b>Title and abstract</b> | 1               | (a) Indicate the study’s design with a commonly used term in the title or the abstract              | 2               | This study used a nested case-control study design.                                                                                                                                                                                                                                                                                                                                                                                                         |
|                           |                 | (b) Provide in the abstract an informative and balanced summary of what was done and what was found | 2-3             | What was done: Shingles exposure and Zostavax vaccination were investigated with dementia risk.<br>What was found: There was a small but non-significant increase in the risk of dementia in subjects with shingles diagnosed 3 years or more prior to dementia diagnosis (OR 1.088 with 95% C.I. 0.978-1.211). In those subjects who had had Zostavax vaccination, the risk of dementia was significant decreased (OR 0.808 with 95% C.I. 0.657 to 0.993). |
| <b>Introduction</b>       |                 |                                                                                                     |                 |                                                                                                                                                                                                                                                                                                                                                                                                                                                             |
| Background/rationale      | 2               | Explain the scientific background and rationale for the investigation being reported                | 4-5             |                                                                                                                                                                                                                                                                                                                                                                                                                                                             |
| Objectives                | 3               | State specific objectives, including any prespecified hypotheses                                    | 5               | In this study, we investigated whether there was an association between shingles and risk of developing dementia in the UK Biobank cohort. VZV is the only herpesvirus for which an effective vaccine is                                                                                                                                                                                                                                                    |

For peer review only

| Item No.       | Recommendation                                                                                                                                                                                                                                                                                                                                                                                                                                                           | Page No. | Relevant text from manuscript                                                                                                                                                                                                                                                                                                                                                           |
|----------------|--------------------------------------------------------------------------------------------------------------------------------------------------------------------------------------------------------------------------------------------------------------------------------------------------------------------------------------------------------------------------------------------------------------------------------------------------------------------------|----------|-----------------------------------------------------------------------------------------------------------------------------------------------------------------------------------------------------------------------------------------------------------------------------------------------------------------------------------------------------------------------------------------|
|                |                                                                                                                                                                                                                                                                                                                                                                                                                                                                          |          | currently approved, and the possible association between Zostavax vaccination and dementia risk was investigated also.                                                                                                                                                                                                                                                                  |
| <b>Methods</b> |                                                                                                                                                                                                                                                                                                                                                                                                                                                                          |          |                                                                                                                                                                                                                                                                                                                                                                                         |
| Study design   | 4 Present key elements of study design early in the paper                                                                                                                                                                                                                                                                                                                                                                                                                | 5        | A nested case-control study.                                                                                                                                                                                                                                                                                                                                                            |
| Setting        | 5 Describe the setting, locations, and relevant dates, including periods of recruitment, exposure, follow-up, and data collection                                                                                                                                                                                                                                                                                                                                        | 5        | The UK Biobank (UKB) is a national cohort with 502,650 participants (both males and females) aged between 39 to 71 years. Participants were recruited in 2006-2010, aged 40-69 years at the time and continue to be longitudinally followed to capture subsequent health events. This study is based on a subset of the entire cohort for which primary care data linkage is available. |
| Participants   | 6 (a) <i>Cohort study</i> —Give the eligibility criteria, and the sources and methods of selection of participants. Describe methods of follow-up<br><i>Case-control study</i> —Give the eligibility criteria, and the sources and methods of case ascertainment and control selection. Give the rationale for the choice of cases and controls<br><i>Cross-sectional study</i> —Give the eligibility criteria, and the sources and methods of selection of participants | 6        | Criteria for case and control identification<br>For incident cases, subjects had to fulfil both of the following criteria 1) dementia diagnosis occurred 3 years or more after the first assessment date and 2) subjects with a dementia code from any sources. For controls,                                                                                                           |

1  
2  
3  
4  
5  
6  
7  
8  
9  
10  
11  
12  
13  
14  
15  
16  
17  
18  
19  
20  
21  
22  
23  
24  
25  
26  
27  
28  
29  
30  
31  
32  
33  
34  
35  
36  
37  
38  
39  
40  
41  
42  
43  
44  
45  
46

|           | <b>Item No.</b> | <b>Recommendation</b>                                                                                                                                                                                                  | <b>Page No.</b> | <b>Relevant text from manuscript</b>                                                                                                                                                                                                                                                                                                                                                                                                                                                                                                                                                                                                                        |
|-----------|-----------------|------------------------------------------------------------------------------------------------------------------------------------------------------------------------------------------------------------------------|-----------------|-------------------------------------------------------------------------------------------------------------------------------------------------------------------------------------------------------------------------------------------------------------------------------------------------------------------------------------------------------------------------------------------------------------------------------------------------------------------------------------------------------------------------------------------------------------------------------------------------------------------------------------------------------------|
|           |                 |                                                                                                                                                                                                                        |                 | subjects with no dementia code from all sources were coded as controls.                                                                                                                                                                                                                                                                                                                                                                                                                                                                                                                                                                                     |
|           |                 | <i>(b) Cohort study</i> —For matched studies, give matching criteria and number of exposed and unexposed<br><i>Case-control study</i> —For matched studies, give matching criteria and the number of controls per case | N/A             |                                                                                                                                                                                                                                                                                                                                                                                                                                                                                                                                                                                                                                                             |
| Variables | 7               | Clearly define all outcomes, exposures, predictors, potential confounders, and effect modifiers. Give diagnostic criteria, if applicable                                                                               | 6-7             | Outcome: All dementia cases across all data sources were then further classified into one of the following: incident or prevalent cases and controls.<br>Exposures: Shingles. For shingles identification, we used the same approach to identify shingles cases and further applied a 3-year window prior to age at dementia diagnosis for cases and age at last follow up for controls.<br><br>:Zostavax vaccination<br>We investigated also the association of shingles and dementia in sub-cohort of subjects who were eligible for Zostavax vaccination- Zostavax vaccine was available within the NHS from 2013 onwards for people age 70 and over. We |

|                              | <b>Item No.</b> | <b>Recommendation</b>                                                                                                                                                                | <b>Page No.</b> | <b>Relevant text from manuscript</b>                                                                                                                                                                                                                                                                                                                                                                                                 |
|------------------------------|-----------------|--------------------------------------------------------------------------------------------------------------------------------------------------------------------------------------|-----------------|--------------------------------------------------------------------------------------------------------------------------------------------------------------------------------------------------------------------------------------------------------------------------------------------------------------------------------------------------------------------------------------------------------------------------------------|
|                              |                 |                                                                                                                                                                                      |                 | <p>therefore computed the age of subjects in 2013 and included only those with age 70+ in this sub-analysis.</p> <p>Confounders: Our analysis suggested that age, sex, age at vaccination and Charlson co-morbidity index (CCI) are confounding factors. We therefore fitted the model adjusted for age and sex for shingles exposure and for Zostavax vaccination, the model was adjusted for age at vaccination, sex and CCI .</p> |
| Data sources/<br>measurement | 8*              | For each variable of interest, give sources of data and details of methods of assessment (measurement). Describe comparability of assessment methods if there is more than one group |                 | <p>Shingles: We used three sources to derive shingles variable including ICD10, 9 and Primary Care record linkage.</p> <p>Zostavax vaccination: Data were extracted from the Primary Care linkage record only. The code provided by the UKB was used to identify Zostavax vaccination including date of event.</p>                                                                                                                   |
| Bias                         | 9               | Describe any efforts to address potential sources of bias                                                                                                                            | 7               | We tested if age (at diagnosis for cases and until last follow up in 2017 for controls), gender, age at vaccination and CCI were                                                                                                                                                                                                                                                                                                     |

1  
2  
3  
4  
5  
6  
7  
8  
9  
10  
11  
12  
13  
14  
15  
16  
17  
18  
19  
20  
21  
22  
23  
24  
25  
26  
27  
28  
29  
30  
31  
32  
33  
34  
35  
36  
37  
38  
39  
40  
41  
42  
43  
44  
45  
46

For peer review only

| Item No.   | Recommendation                               | Page No. | Relevant text from manuscript                                                                                                                                                                                                                                                                                                                                                                                                                                                                                                                                                                                                                                                                                                                                                                                                                                                     |
|------------|----------------------------------------------|----------|-----------------------------------------------------------------------------------------------------------------------------------------------------------------------------------------------------------------------------------------------------------------------------------------------------------------------------------------------------------------------------------------------------------------------------------------------------------------------------------------------------------------------------------------------------------------------------------------------------------------------------------------------------------------------------------------------------------------------------------------------------------------------------------------------------------------------------------------------------------------------------------|
| Study size | 10 Explain how the study size was arrived at | 7        | <p>a confounding factor. Each potential confounder was tested and had to satisfy two criteria if they were to be defined as a confounder.</p> <p>Criterion 1: among the unexposed (subjects with no shingles code), there should be an association between the confounder and the dementia outcome.</p> <p>Criterion 2: the potential confounder must be associated with the main exposure (shingles), but not as a result of the exposure. To achieve this, we tested the association between the confounder and shingles in the control population.</p> <p>Criteria for case and control identification</p> <p>For incident cases, subjects had to fulfil both of the following criteria 1) dementia diagnosis occurred 3 years or more after the first assessment date and 2) subjects with a dementia code from any sources. For controls, subjects with no dementia code</p> |



1  
2  
3  
4  
5  
6  
7  
8  
9  
10  
11  
12  
13  
14  
15  
16  
17  
18  
19  
20  
21  
22  
23  
24  
25  
26  
27  
28  
29  
30  
31  
32  
33  
34  
35  
36  
37  
38  
39  
40  
41  
42  
43  
44  
45  
46

---

| Item No. | Recommendation | Page No. | Relevant text from manuscript |
|----------|----------------|----------|-------------------------------|
|----------|----------------|----------|-------------------------------|

---

|  |  |  |                                          |
|--|--|--|------------------------------------------|
|  |  |  | from all sources were coded as controls. |
|--|--|--|------------------------------------------|

---

Continued on next page

For peer review only

1  
2  
3  
4  
5  
6  
7  
8  
9  
10  
11  
12  
13  
14  
15  
16  
17  
18  
19  
20  
21  
22  
23  
24  
25  
26  
27  
28  
29  
30  
31  
32  
33  
34  
35  
36  
37  
38  
39  
40  
41  
42  
43  
44  
45  
46

|                        |    |                                                                                                                              |   |                                                                                                                                                                                                                                                                                                                                                                                                                                                                                                                                                                                                                                                                                    |
|------------------------|----|------------------------------------------------------------------------------------------------------------------------------|---|------------------------------------------------------------------------------------------------------------------------------------------------------------------------------------------------------------------------------------------------------------------------------------------------------------------------------------------------------------------------------------------------------------------------------------------------------------------------------------------------------------------------------------------------------------------------------------------------------------------------------------------------------------------------------------|
| Quantitative variables | 11 | Explain how quantitative variables were handled in the analyses. If applicable, describe which groupings were chosen and why | 7 | Shingles variable was coded as binary (yes/no).<br>Zostavax vaccination variable was coded as binary (yes/no).<br>For shingles and Zostavax vaccination variable, “no” category was used as reference category.                                                                                                                                                                                                                                                                                                                                                                                                                                                                    |
| Statistical methods    | 12 | (a) Describe all statistical methods, including those used to control for confounding                                        | 7 | Logistic regression analysis was performed using Stata version 15.0 9. Odds ratios (ORs) and 95% confidence intervals (CIs) were estimated. A significant odds ratio is considered when 95% CI does not include 1. For shingles and Zostavax vaccination variable, “no” category was used as reference category. We tested if age (at diagnosis for cases and until last follow up in 2017 for controls) and gender were a confounding factor for shingles and a dementia outcome. For Zostavax vaccination, we further tested age at vaccination, CCI variables. Each potential confounder was tested and had to satisfy two criteria if they were to be defined as a confounder. |
|                        |    | (b) Describe any methods used to examine subgroups and interactions                                                          | 7 | Zostavax vaccine was available within the NHS from 2013 onwards for people age 70 and over. We therefore computed the age of subjects in 2013 and included only                                                                                                                                                                                                                                                                                                                                                                                                                                                                                                                    |

For peer review only

|                  |     |                                                                                                                                                                                                   |     |                                                                                                                                                                                                                   |
|------------------|-----|---------------------------------------------------------------------------------------------------------------------------------------------------------------------------------------------------|-----|-------------------------------------------------------------------------------------------------------------------------------------------------------------------------------------------------------------------|
|                  |     |                                                                                                                                                                                                   |     | those with age 70+ in this sub-analysis.                                                                                                                                                                          |
|                  |     | (c) Explain how missing data were addressed                                                                                                                                                       |     |                                                                                                                                                                                                                   |
|                  |     | (d) <i>Cohort study</i> —If applicable, explain how loss to follow-up was addressed                                                                                                               | N/A |                                                                                                                                                                                                                   |
|                  |     | <i>Case-control study</i> —If applicable, explain how matching of cases and controls was addressed                                                                                                |     |                                                                                                                                                                                                                   |
|                  |     | <i>Cross-sectional study</i> —If applicable, describe analytical methods taking account of sampling strategy                                                                                      |     |                                                                                                                                                                                                                   |
|                  |     | (e) Describe any sensitivity analyses                                                                                                                                                             | N/A |                                                                                                                                                                                                                   |
| <b>Results</b>   |     |                                                                                                                                                                                                   |     |                                                                                                                                                                                                                   |
| Participants     | 13* | (a) Report numbers of individuals at each stage of study—eg numbers potentially eligible, examined for eligibility, confirmed eligible, included in the study, completing follow-up, and analysed | 7   | There were 2,378 incident cases and 225,845 controls (subjects with no dementia).                                                                                                                                 |
|                  |     | (b) Give reasons for non-participation at each stage                                                                                                                                              | N/A |                                                                                                                                                                                                                   |
|                  |     | (c) Consider use of a flow diagram                                                                                                                                                                | N/A |                                                                                                                                                                                                                   |
| Descriptive data | 14* | (a) Give characteristics of study participants (eg demographic, clinical, social) and information on exposures and potential confounders                                                          | 8   | The number of female participants was slightly higher than males (54.71% female and 45.29% male - see Table 2). There were however slight more males than females in the incident group.                          |
|                  |     | (b) Indicate number of participants with missing data for each variable of interest                                                                                                               | N/A |                                                                                                                                                                                                                   |
|                  |     | (c) <i>Cohort study</i> —Summarise follow-up time (eg, average and total amount)                                                                                                                  |     |                                                                                                                                                                                                                   |
| Outcome data     | 15* | <i>Cohort study</i> —Report numbers of outcome events or summary measures over time                                                                                                               |     |                                                                                                                                                                                                                   |
|                  |     | <i>Case-control study</i> —Report numbers in each exposure category, or summary measures of exposure                                                                                              | 8-9 | The total number of participants who had shingles was 35,116 (or 15.39%) (Table 3). There were 18% of dementia cases with shingles as compared to 15% of controls. Table 5 report number of Zostavax vaccination. |
|                  |     | <i>Cross-sectional study</i> —Report numbers of outcome events or summary measures                                                                                                                |     |                                                                                                                                                                                                                   |

1  
2  
3  
4  
5  
6  
7  
8  
9  
10  
11  
12  
13  
14  
15  
16  
17  
18  
19  
20  
21  
22  
23  
24  
25  
26  
27  
28  
29  
30  
31  
32  
33  
34  
35  
36  
37  
38  
39  
40  
41  
42  
43  
44  
45  
46

|              |    |                                                                                                                                                                                                              |     |                                                                                                                                                                                                                                                                                                                                                                                                                           |
|--------------|----|--------------------------------------------------------------------------------------------------------------------------------------------------------------------------------------------------------------|-----|---------------------------------------------------------------------------------------------------------------------------------------------------------------------------------------------------------------------------------------------------------------------------------------------------------------------------------------------------------------------------------------------------------------------------|
| Main results | 16 | (a) Give unadjusted estimates and, if applicable, confounder-adjusted estimates and their precision (eg, 95% confidence interval). Make clear which confounders were adjusted for and why they were included | 8-9 | After adjusting for age and sex, there was a small but non-significant increase in the risk of dementia in subjects with shingles diagnosed 3 years or more prior to dementia diagnosis (OR 1.088 with 95%C.I. 0.978-1.211) (Table 4). Subjects who had had dementia, an inverse association suggesting decreased risk was observed for subjects who had been vaccinated (OR 0.808 with 95%C.I. 0.657 to 0.993) (Table5). |
|              |    | (b) Report category boundaries when continuous variables were categorized                                                                                                                                    | N/A |                                                                                                                                                                                                                                                                                                                                                                                                                           |
|              |    | (c) If relevant, consider translating estimates of relative risk into absolute risk for a meaningful time period                                                                                             | N/A |                                                                                                                                                                                                                                                                                                                                                                                                                           |

Continued on next page

For peer review only

|    |                   |    |                                                                                                                                                            |                                       |
|----|-------------------|----|------------------------------------------------------------------------------------------------------------------------------------------------------------|---------------------------------------|
| 1  |                   |    |                                                                                                                                                            |                                       |
| 2  | Other analyses    | 17 | Report other analyses done—eg analyses of subgroups and interactions, and sensitivity analyses                                                             | N/A                                   |
| 3  |                   |    |                                                                                                                                                            |                                       |
| 4  | <b>Discussion</b> |    |                                                                                                                                                            |                                       |
| 5  | Key results       | 18 | Summarise key results with reference to study objectives                                                                                                   | 10                                    |
| 6  |                   |    |                                                                                                                                                            | Our finding suggests that there was   |
| 7  |                   |    |                                                                                                                                                            | a small but non-significant increase  |
| 8  |                   |    |                                                                                                                                                            | in the risk of dementia in subjects   |
| 9  |                   |    |                                                                                                                                                            | with shingles diagnosed 3 years or    |
| 10 |                   |    |                                                                                                                                                            | more prior to dementia diagnosis      |
| 11 |                   |    |                                                                                                                                                            | after adjust for age and sex.         |
| 12 |                   |    |                                                                                                                                                            | 12                                    |
| 13 |                   |    |                                                                                                                                                            | We sought possible effects of         |
| 14 |                   |    |                                                                                                                                                            | vaccination with Zostavax. In our     |
| 15 |                   |    |                                                                                                                                                            | study, subjects who had been          |
| 16 |                   |    |                                                                                                                                                            | vaccinated showed the inverse         |
| 17 |                   |    |                                                                                                                                                            | effect, with a decreased dementia     |
| 18 |                   |    |                                                                                                                                                            | risk of around 20%.                   |
| 19 |                   |    |                                                                                                                                                            |                                       |
| 20 | Limitations       | 19 | Discuss limitations of the study, taking into account sources of potential bias or imprecision. Discuss both direction and magnitude of any potential bias | 12-13                                 |
| 21 |                   |    |                                                                                                                                                            | Our study has inherent strengths      |
| 22 |                   |    |                                                                                                                                                            | and weaknesses. The UKB is a          |
| 23 |                   |    |                                                                                                                                                            | national cohort of half a million     |
| 24 |                   |    |                                                                                                                                                            | people with an average follow up of   |
| 25 |                   |    |                                                                                                                                                            | almost 12 years (up until 2020).      |
| 26 |                   |    |                                                                                                                                                            | Disease outcome was ascertained       |
| 27 |                   |    |                                                                                                                                                            | by robust sources including the       |
| 28 |                   |    |                                                                                                                                                            | Hospital Episodes Statistics (HES)    |
| 29 |                   |    |                                                                                                                                                            | and through primary care data         |
| 30 |                   |    |                                                                                                                                                            | linkage. Although the primary care    |
| 31 |                   |    |                                                                                                                                                            | data linkage covered 45% of           |
| 32 |                   |    |                                                                                                                                                            | participants at the time of data      |
| 33 |                   |    |                                                                                                                                                            | analysis, this source of data has the |
| 34 |                   |    |                                                                                                                                                            | benefit of capturing mild symptom     |
| 35 |                   |    |                                                                                                                                                            | shingles cases. Most people           |
| 36 |                   |    |                                                                                                                                                            | suffering from shingles seeks         |
| 37 |                   |    |                                                                                                                                                            | medical advice/treatment first from   |
| 38 |                   |    |                                                                                                                                                            |                                       |
| 39 |                   |    |                                                                                                                                                            |                                       |
| 40 |                   |    |                                                                                                                                                            |                                       |
| 41 |                   |    |                                                                                                                                                            |                                       |
| 42 |                   |    |                                                                                                                                                            |                                       |
| 43 |                   |    |                                                                                                                                                            |                                       |
| 44 |                   |    |                                                                                                                                                            |                                       |
| 45 |                   |    |                                                                                                                                                            |                                       |
| 46 |                   |    |                                                                                                                                                            |                                       |

1  
2  
3  
4  
5  
6  
7  
8  
9  
10  
11  
12  
13  
14  
15  
16  
17  
18  
19  
20  
21  
22  
23  
24  
25  
26

their GP prior to referral to hospital for further treatments, particularly with some severe cases, hence these data have enabled us to capture shingles cases in the community. We were able to demonstrate the effect of shingles immunisation and dementia risk. The weaknesses include the fact that the UKB entire cohort consists of only 1.12% of all dementia cases with age of 65 and over, which is far less than the national figure prevalence of dementia - 7.1% for the total age-standardised 65+ population (based on 2013 data)<sup>25</sup>. The diagnoses are also based on records rather than direct patient contact (although the validity seems satisfactory).

27 Interpretation 20 Give a cautious overall interpretation of results considering objectives, limitations, multiplicity of  
28 analyses, results from similar studies, and other relevant evidence  
29  
30  
31  
32  
33  
34  
35  
36  
37  
38  
39  
40  
41  
42

13 It is to be noted that the UKB participants are in general healthier, less obese and smoke less than people in the general population. It was also reported that UKB participants suffered less heart and kidney disease and cancer as compared to the national figures<sup>24</sup>. This has led to a non-representative of the sampling population, a so-called a “healthy volunteer” selection bias.

|                          |    |                                                                                                                                                               |    |                                                                                                                                                                                                                                             |
|--------------------------|----|---------------------------------------------------------------------------------------------------------------------------------------------------------------|----|---------------------------------------------------------------------------------------------------------------------------------------------------------------------------------------------------------------------------------------------|
|                          |    |                                                                                                                                                               |    | We did not take any anti-herpetic treatments into account which could potentially have an effect on dementia risk if shingles occurred long before dementia diagnosis. Also, we did not include other types of herpesvirus in our analysis. |
| Generalisability         | 21 | Discuss the generalisability (external validity) of the study results                                                                                         | 13 | Our study suggests a potential effect of Zostavax vaccination in reducing the risk of dementia.                                                                                                                                             |
| <b>Other information</b> |    |                                                                                                                                                               |    |                                                                                                                                                                                                                                             |
| Funding                  | 22 | Give the source of funding and the role of the funders for the present study and, if applicable, for the original study on which the present article is based | 13 | Funding<br>We would like to thank the Advantage Foundation for funding this work.<br>Role of sponsor<br>Sponsor has no role in study design, data acquisition or involve in any process of data analysis.                                   |

\*Give information separately for cases and controls in case-control studies and, if applicable, for exposed and unexposed groups in cohort and cross-sectional studies.

**Note:** An Explanation and Elaboration article discusses each checklist item and gives methodological background and published examples of transparent reporting. The STROBE checklist is best used in conjunction with this article (freely available on the Web sites of PLoS Medicine at <http://www.plosmedicine.org/>, Annals of Internal Medicine at <http://www.annals.org/>, and Epidemiology at <http://www.epidem.com/>). Information on the STROBE Initiative is available at [www.strobe-statement.org](http://www.strobe-statement.org).
